# Supplementary material for: Proteomic analysis of Taenia solium cysticercus and adult stages
Source: Frontiers journal article supplement (doi:10.3389/fvets.2022.934197), 2023-01-09
Supplement: Data_Sheet_1.ZIP [file Data_Sheet_1.ZIP]

## Sheet: AvsL
Protein accession	Protein description	A/L Ratio	Regulated Type	A/L P value	Gene name	Mol. weight [kDa]
A0A088FW30	Stefin 1 OS=Taenia asiatica OX=60517 GN=TASK_LOCUS1967 PE=2 SV=1	0.234	Down	1.63922e-05	TASK_LOCUS1967	10.78
A0A0R3VSA4	Titin(predicted) OS=Taenia asiatica OX=60517 GN=TASK_LOCUS21 PE=4 SV=3	0.028	Down	5.285e-08	TASK_LOCUS21	82.75
A0A0R3VSA8	Galectin domain-containing protein(predicted) OS=Taenia asiatica OX=60517 GN=TASK_LOCUS26 PE=4 SV=1	0.328	Down	6.3548e-05	TASK_LOCUS26	137.15
A0A0R3VSE0	Reticulon-4 receptor(predicted) OS=Taenia asiatica OX=60517 GN=TASK_LOCUS64 PE=4 SV=1	0.298	Down	5.5901e-05	TASK_LOCUS64	77.302
A0A0R3VSL3	SH3_10 domain-containing protein(predicted) OS=Taenia asiatica OX=60517 GN=TASK_LOCUS162 PE=4 SV=2	0.077	Down	1.4702e-07	TASK_LOCUS162	349.79
A0A0R3VSM0	BAR domain-containing protein(predicted) OS=Taenia asiatica OX=60517 GN=TASK_LOCUS171 PE=4 SV=1	0.232	Down	1.61299e-05	TASK_LOCUS171	26.966
A0A0R3VSW8	Fructose-bisphosphate aldolase OS=Taenia asiatica OX=60517 GN=TASK_LOCUS293 PE=3 SV=1	0.444	Down	0.00148405	TASK_LOCUS293	39.712
A0A0R3VT10	Tetratricopeptide repeat protein 39B (Fragment)(predicted) OS=Taenia asiatica OX=60517 PE=4 SV=1	0.376	Down	0.000183717	---	60.175
A0A0R3VT29	Fatty acid binding protein FABP2(predicted) OS=Taenia asiatica OX=60517 GN=TASK_LOCUS367 PE=4 SV=1	0.307	Down	5.7085e-05	TASK_LOCUS367	19.375
A0A0R3VT40	Pyruvate kinase OS=Taenia asiatica OX=60517 GN=TASK_LOCUS382 PE=3 SV=1	0.316	Down	6.077e-05	TASK_LOCUS382	54.238
A0A0R3VT44	ARF GTPase activating protein GIT2(predicted) OS=Taenia asiatica OX=60517 GN=TASK_LOCUS386 PE=4 SV=1	0.468	Down	0.0054625	TASK_LOCUS386	109.03
A0A0R3VTE7	Ubiquitin protein ligase BRE1(predicted) OS=Taenia asiatica OX=60517 GN=TASK_LOCUS505 PE=4 SV=2	0.086	Down	2.4633e-07	TASK_LOCUS505	116.8
A0A0R3VTG7	Cytochrome b-c1 complex subunit 7 OS=Taenia asiatica OX=60517 GN=TASK_LOCUS530 PE=3 SV=1	0.29	Down	4.2313e-05	TASK_LOCUS530	15.472
A0A0R3VTL0	PI31_Prot_C domain-containing protein(predicted) OS=Taenia asiatica OX=60517 GN=TASK_LOCUS586 PE=4 SV=1	0.371	Down	0.00017556	TASK_LOCUS586	32.779
A0A0R3VTN3	Expressed conserved protein(predicted) OS=Taenia asiatica OX=60517 PE=4 SV=1	0.431	Down	0.00093658	---	33.653
A0A0R3VTP0	SCP domain-containing protein(predicted) OS=Taenia asiatica OX=60517 GN=TASK_LOCUS621 PE=4 SV=1	0.171	Down	2.4559e-06	TASK_LOCUS621	28.748
A0A0R3VTQ4	Alpha 2 macroglobulin(predicted) OS=Taenia asiatica OX=60517 GN=TASK_LOCUS637 PE=4 SV=1	0.031	Down	5.3974e-08	TASK_LOCUS637	132.49
A0A0R3VTR1	Dolichyl pyrophosphate Man9GlcNAc2 alpha-1,3-glucosyltransferase(predicted) OS=Taenia asiatica OX=60517 GN=TASK_LOCUS648 PE=4 SV=1	0.445	Down	0.00183832	TASK_LOCUS648	28.355
A0A0R3VTT5	Protein kinase C OS=Taenia asiatica OX=60517 PE=3 SV=1	0.379	Down	0.000197497	---	63.593
A0A0R3VTZ7	Endostatin domain-containing protein(predicted) OS=Taenia asiatica OX=60517 GN=TASK_LOCUS753 PE=4 SV=1	0.128	Down	7.3751e-07	TASK_LOCUS753	101.95
A0A0R3VUA2	Aminotran_1_2 domain-containing protein(predicted) OS=Taenia asiatica OX=60517 GN=TASK_LOCUS883 PE=4 SV=1	0.219	Down	4.6541e-06	TASK_LOCUS883	56.839
A0A0R3VUB5	LITAF domain-containing protein(predicted) OS=Taenia asiatica OX=60517 GN=TASK_LOCUS904 PE=4 SV=1	0.417	Down	0.00049536	TASK_LOCUS904	12.536
A0A0R3VUE2	START domain-containing protein(predicted) OS=Taenia asiatica OX=60517 GN=TASK_LOCUS935 PE=4 SV=1	0.498	Down	0.042521	TASK_LOCUS935	39.282
A0A0R3VUE4	LRRCT domain-containing protein(predicted) OS=Taenia asiatica OX=60517 GN=TASK_LOCUS937 PE=4 SV=1	0.435	Down	0.00134468	TASK_LOCUS937	44.103
A0A0R3VUE8	cAMP dependent protein kinase regulatory(predicted) OS=Taenia asiatica OX=60517 GN=TASK_LOCUS943 PE=4 SV=1	0.284	Down	3.9418e-05	TASK_LOCUS943	41.84
A0A0R3VUR5	Leucine rich repeat containing protein 15(predicted) OS=Taenia asiatica OX=60517 GN=TASK_LOCUS1083 PE=4 SV=1	0.309	Down	5.719e-05	TASK_LOCUS1083	78.235
A0A0R3VUT8	PHB domain-containing protein(predicted) OS=Taenia asiatica OX=60517 GN=TASK_LOCUS1113 PE=4 SV=1	0.249	Down	1.95551e-05	TASK_LOCUS1113	38.967
A0A0R3VUV9	Rab(predicted) OS=Taenia asiatica OX=60517 GN=TASK_LOCUS1135 PE=4 SV=1	0.268	Down	2.2662e-05	TASK_LOCUS1135	23.638
A0A0R3VV05	Expressed conserved protein(predicted) OS=Taenia asiatica OX=60517 GN=TASK_LOCUS1188 PE=4 SV=1	0.344	Down	9.7885e-05	TASK_LOCUS1188	37.205
A0A0R3VVC3	ATPase H transporting lysosomal accessory(predicted) OS=Taenia asiatica OX=60517 GN=TASK_LOCUS1332 PE=4 SV=1	0.447	Down	0.00188151	TASK_LOCUS1332	10.419
A0A0R3VVD3	BolA-like protein 3(predicted) OS=Taenia asiatica OX=60517 GN=TASK_LOCUS1342 PE=3 SV=1	0.251	Down	2.0255e-05	TASK_LOCUS1342	31.957
A0A0R3VVG2	MFS domain-containing protein(predicted) OS=Taenia asiatica OX=60517 GN=TASK_LOCUS1374 PE=3 SV=1	0.201	Down	3.7717e-06	TASK_LOCUS1374	50.503
A0A0R3VVI5	SH3 domain-binding glutamic acid-rich protein(predicted) OS=Taenia asiatica OX=60517 GN=TASK_LOCUS1400 PE=4 SV=1	0.383	Down	0.00023712	TASK_LOCUS1400	36.646
A0A0R3VVM6	LLGL domain-containing protein(predicted) OS=Taenia asiatica OX=60517 GN=TASK_LOCUS1448 PE=4 SV=1	0.343	Down	8.4051e-05	TASK_LOCUS1448	132.3
A0A0R3VVZ5	ENTH domain-containing protein(predicted) OS=Taenia asiatica OX=60517 GN=TASK_LOCUS1588 PE=4 SV=1	0.293	Down	4.3668e-05	TASK_LOCUS1588	12.637
A0A0R3VVZ9	BAR domain-containing protein(predicted) OS=Taenia asiatica OX=60517 GN=TASK_LOCUS1592 PE=4 SV=1	0.05	Down	9.6085e-08	TASK_LOCUS1592	28.875
A0A0R3VW15	Aconitate hydratase, mitochondrial OS=Taenia asiatica OX=60517 GN=TASK_LOCUS1609 PE=3 SV=1	0.195	Down	3.2311e-06	TASK_LOCUS1609	84.755
A0A0R3VW26	Expressed conserved protein(predicted) OS=Taenia asiatica OX=60517 PE=4 SV=1	0.031	Down	6.367e-08	---	58.667
A0A0R3VWC1	PDZ domain-containing protein(predicted) OS=Taenia asiatica OX=60517 GN=TASK_LOCUS1716 PE=4 SV=1	0.121	Down	6.4542e-07	TASK_LOCUS1716	20.903
A0A0R3VWD6	Tegumental protein(predicted) OS=Taenia asiatica OX=60517 GN=TASK_LOCUS1731 PE=4 SV=1	0.008	Down	2.063e-09	TASK_LOCUS1731	20.722
A0A0R3VWF4	Expressed conserved protein(predicted) OS=Taenia asiatica OX=60517 GN=TASK_LOCUS1749 PE=4 SV=1	0.258	Down	2.1208e-05	TASK_LOCUS1749	169.64
A0A0R3VWJ5	Expressed conserved protein(predicted) OS=Taenia asiatica OX=60517 GN=TASK_LOCUS1790 PE=4 SV=1	0.483	Down	0.013178	TASK_LOCUS1790	15.22
A0A0R3VWK0	J domain-containing protein(predicted) OS=Taenia asiatica OX=60517 GN=TASK_LOCUS1795 PE=4 SV=1	0.282	Down	3.8811e-05	TASK_LOCUS1795	40.205
A0A0R3VWQ6	SH2 domain-containing protein(predicted) OS=Taenia asiatica OX=60517 GN=TASK_LOCUS1851 PE=4 SV=1	0.119	Down	6.3029e-07	TASK_LOCUS1851	68.464
A0A0R3VWW4	Transgelin OS=Taenia asiatica OX=60517 GN=TASK_LOCUS1909 PE=3 SV=1	0.184	Down	2.9465e-06	TASK_LOCUS1909	39.448
A0A0R3VWZ7	Cathepsin L-like cysteine peptidase(predicted) OS=Taenia asiatica OX=60517 GN=TASK_LOCUS1942 PE=3 SV=1	0.412	Down	0.00048306	TASK_LOCUS1942	41.251
A0A0R3VX31	Expressed conserved protein(predicted) OS=Taenia asiatica OX=60517 GN=TASK_LOCUS1976 PE=4 SV=1	0.173	Down	2.6842e-06	TASK_LOCUS1976	17.14
A0A0R3VX63	Tegumental protein(predicted) OS=Taenia asiatica OX=60517 GN=TASK_LOCUS2008 PE=4 SV=1	0.106	Down	4.8816e-07	TASK_LOCUS2008	11.53
A0A0R3VXH7	Surface protein PspC(predicted) OS=Taenia asiatica OX=60517 GN=TASK_LOCUS2122 PE=4 SV=1	0.411	Down	0.0004757	TASK_LOCUS2122	34.126
A0A0R3VXI4	Transgelin OS=Taenia asiatica OX=60517 GN=TASK_LOCUS2129 PE=3 SV=1	0.112	Down	5.0155e-07	TASK_LOCUS2129	21.229
A0A0R3VXJ8	DCC interacting protein 13 beta(predicted) OS=Taenia asiatica OX=60517 GN=TASK_LOCUS2143 PE=4 SV=1	0.45	Down	0.0029023	TASK_LOCUS2143	8.5408
A0A0R3VXM8	Peptidase_M16 domain-containing protein(predicted) OS=Taenia asiatica OX=60517 GN=TASK_LOCUS2173 PE=4 SV=1	0.242	Down	1.78614e-05	TASK_LOCUS2173	21.107
A0A0R3VXS3	NAD_binding_2 domain-containing protein(predicted) OS=Taenia asiatica OX=60517 GN=TASK_LOCUS2218 PE=4 SV=1	0.391	Down	0.00028005	TASK_LOCUS2218	15.843
A0A0R3VXU7	PK_C domain-containing protein(predicted) OS=Taenia asiatica OX=60517 GN=TASK_LOCUS2242 PE=4 SV=1	0.478	Down	0.0081177	TASK_LOCUS2242	7.059
A0A0R3VXW0	Peptidase_M1 domain-containing protein(predicted) OS=Taenia asiatica OX=60517 GN=TASK_LOCUS2255 PE=4 SV=1	0.268	Down	2.2136e-05	TASK_LOCUS2255	51.996
A0A0R3VYA0	Peptidase_M16_M domain-containing protein(predicted) OS=Taenia asiatica OX=60517 GN=TASK_LOCUS2395 PE=4 SV=1	0.077	Down	1.5359e-07	TASK_LOCUS2395	19.057
A0A0R3VYA3	C2 domain-containing protein(predicted) OS=Taenia asiatica OX=60517 GN=TASK_LOCUS2398 PE=4 SV=1	0.38	Down	0.00020007	TASK_LOCUS2398	17.452
A0A0R3VYF9	A2M_recep domain-containing protein(predicted) OS=Taenia asiatica OX=60517 GN=TASK_LOCUS2454 PE=4 SV=1	0.267	Down	2.1952e-05	TASK_LOCUS2454	31.635
A0A0R3VYQ3	Titin(predicted) OS=Taenia asiatica OX=60517 GN=TASK_LOCUS2548 PE=4 SV=1	0.394	Down	0.00028387	TASK_LOCUS2548	71.457
A0A0R3VZ08	Bravo-like intracellular region(predicted) OS=Taenia asiatica OX=60517 GN=TASK_LOCUS2653 PE=4 SV=1	0.147	Down	1.0259e-06	TASK_LOCUS2653	25.954
A0A0R3VZA1	Expressed conserved protein(predicted) OS=Taenia asiatica OX=60517 GN=TASK_LOCUS2746 PE=4 SV=1	0.018	Down	1.1654e-08	TASK_LOCUS2746	78.556
A0A0R3VZZ0	TED_complement domain-containing protein(predicted) OS=Taenia asiatica OX=60517 GN=TASK_LOCUS2985 PE=4 SV=1	0.13	Down	8.1092e-07	TASK_LOCUS2985	50.6
A0A0R3W0J1	Ig-like domain-containing protein(predicted) OS=Taenia asiatica OX=60517 GN=TASK_LOCUS3186 PE=4 SV=1	0.155	Down	1.6958e-06	TASK_LOCUS3186	36.083
A0A0R3W0L3	ERAP1_C domain-containing protein(predicted) OS=Taenia asiatica OX=60517 GN=TASK_LOCUS3208 PE=4 SV=1	0.405	Down	0.00034447	TASK_LOCUS3208	19.288
A0A0R3W0Q2	Ras protein Rab 2A(predicted) OS=Taenia asiatica OX=60517 GN=TASK_LOCUS3254 PE=4 SV=1	0.351	Down	0.000104141	TASK_LOCUS3254	23.47
A0A0R3W0U7	N acetylated alpha linked acidic dipeptidase 2(predicted) OS=Taenia asiatica OX=60517 GN=TASK_LOCUS3315 PE=4 SV=1	0.434	Down	0.00095588	TASK_LOCUS3315	86.365
A0A0R3W0W2	PDZ and LIM domain protein Zasp(predicted) OS=Taenia asiatica OX=60517 GN=TASK_LOCUS3335 PE=4 SV=1	0.441	Down	0.0014777	TASK_LOCUS3335	33.855
A0A0R3W0W3	PDZ and LIM domain protein(predicted) OS=Taenia asiatica OX=60517 GN=TASK_LOCUS3336 PE=4 SV=1	0.356	Down	0.000136441	TASK_LOCUS3336	28.368
A0A0R3W148	Glyco_trans_2-like domain-containing protein(predicted) OS=Taenia asiatica OX=60517 GN=TASK_LOCUS3440 PE=4 SV=1	0.425	Down	0.00085594	TASK_LOCUS3440	37.244
A0A0R3W1A1	Citrate synthase OS=Taenia asiatica OX=60517 GN=TASK_LOCUS3498 PE=3 SV=1	0.006	Down	1.4397e-09	TASK_LOCUS3498	52.302
A0A0R3W1C8	Calpain catalytic domain-containing protein(predicted) OS=Taenia asiatica OX=60517 GN=TASK_LOCUS3530 PE=3 SV=1	0.196	Down	3.3193e-06	TASK_LOCUS3530	53.013
A0A0R3W1Y3	Coproporphyrinogen III oxidase(predicted) OS=Taenia asiatica OX=60517 GN=TASK_LOCUS3778 PE=4 SV=1	0.332	Down	8.1658e-05	TASK_LOCUS3778	33.375
A0A0R3W245	CBM21 domain-containing protein(predicted) OS=Taenia asiatica OX=60517 GN=TASK_LOCUS3852 PE=4 SV=1	0.409	Down	0.00041649	TASK_LOCUS3852	67.96
A0A0R3W296	Protein diaphanous(predicted) OS=Taenia asiatica OX=60517 GN=TASK_LOCUS3918 PE=4 SV=1	0.456	Down	0.003703	TASK_LOCUS3918	120.48
A0A0R3W2C6	Glutathione transferase(predicted) OS=Taenia asiatica OX=60517 GN=TASK_LOCUS3957 PE=3 SV=1	0.219	Down	4.331e-06	TASK_LOCUS3957	27.537
A0A0R3W2C8	COX6C domain-containing protein(predicted) OS=Taenia asiatica OX=60517 GN=TASK_LOCUS3960 PE=4 SV=1	0.253	Down	2.0587e-05	TASK_LOCUS3960	9.8512
A0A0R3W2D3	Dynein light chain(predicted) OS=Taenia asiatica OX=60517 GN=TASK_LOCUS3967 PE=4 SV=1	0.179	Down	2.8008e-06	TASK_LOCUS3967	21.541
A0A0R3W2E7	Calcium binding protein 39(predicted) OS=Taenia asiatica OX=60517 GN=TASK_LOCUS3984 PE=4 SV=1	0.194	Down	3.1468e-06	TASK_LOCUS3984	45.575
A0A0R3W2H9	Peptidase A1 domain-containing protein(predicted) OS=Taenia asiatica OX=60517 GN=TASK_LOCUS4027 PE=3 SV=1	0.282	Down	3.8246e-05	TASK_LOCUS4027	47.059
A0A0R3W2J0	Cytochrome b-c1 complex subunit Rieske(predicted) OS=Taenia asiatica OX=60517 GN=TASK_LOCUS4041 PE=4 SV=1	0.418	Down	0.00054024	TASK_LOCUS4041	65.237
A0A0R3W2J8	Ng dimethylarginine dimethylaminohydrolase(predicted) OS=Taenia asiatica OX=60517 GN=TASK_LOCUS4054 PE=4 SV=1	0.435	Down	0.00125603	TASK_LOCUS4054	30.377
A0A0R3W2K4	Porphobilinogen deaminase(predicted) OS=Taenia asiatica OX=60517 PE=4 SV=1	0.293	Down	4.4243e-05	---	82.984
A0A0R3W2M0	Ribosomal protein S6 kinase(predicted) OS=Taenia asiatica OX=60517 PE=3 SV=2	0.434	Down	0.00108157	---	45.192
A0A0R3W2P8	Fn3_like domain-containing protein(predicted) OS=Taenia asiatica OX=60517 GN=TASK_LOCUS4124 PE=4 SV=1	0.154	Down	1.3944e-06	TASK_LOCUS4124	93.782
A0A0R3W2S4	Amidohydro-rel domain-containing protein(predicted) OS=Taenia asiatica OX=60517 GN=TASK_LOCUS4159 PE=4 SV=1	0.21	Down	3.8636e-06	TASK_LOCUS4159	60.276
A0A0R3W2W2	Purine nucleoside phosphorylase OS=Taenia asiatica OX=60517 GN=TASK_LOCUS4202 PE=3 SV=1	0.247	Down	1.88839e-05	TASK_LOCUS4202	32.358
A0A0R3W2W6	LIM zinc-binding domain-containing protein(predicted) OS=Taenia asiatica OX=60517 GN=TASK_LOCUS4206 PE=4 SV=1	0.325	Down	6.2067e-05	TASK_LOCUS4206	8.5408
A0A0R3W2X6	Usp domain-containing protein(predicted) OS=Taenia asiatica OX=60517 GN=TASK_LOCUS4218 PE=4 SV=1	0.495	Down	0.028477	TASK_LOCUS4218	24.877
A0A0R3W2Y1	Dynein light chain type 1 2(predicted) OS=Taenia asiatica OX=60517 GN=TASK_LOCUS4224 PE=4 SV=2	0.22	Down	4.6748e-06	TASK_LOCUS4224	72.376
A0A0R3W2Y5	SERPIN domain-containing protein(predicted) OS=Taenia asiatica OX=60517 GN=TASK_LOCUS4231 PE=3 SV=1	0.395	Down	0.00029873	TASK_LOCUS4231	45.712
A0A0R3W2Z5	Myoferlin(predicted) OS=Taenia asiatica OX=60517 GN=TASK_LOCUS4243 PE=4 SV=2	0.004	Down	1.4535e-10	TASK_LOCUS4243	214.18
A0A0R3W325	Nonmuscle myosin II heavy chain(predicted) OS=Taenia asiatica OX=60517 GN=TASK_LOCUS4280 PE=4 SV=1	0.424	Down	0.00082339	TASK_LOCUS4280	122.65
A0A0R3W388	Purine nucleoside phosphorylase OS=Taenia asiatica OX=60517 GN=TASK_LOCUS4364 PE=3 SV=1	0.093	Down	4.1516e-07	TASK_LOCUS4364	31.127
A0A0R3W3A4	DUF4205 domain-containing protein(predicted) OS=Taenia asiatica OX=60517 GN=TASK_LOCUS4385 PE=4 SV=1	0.472	Down	0.0054758	TASK_LOCUS4385	44.056
A0A0R3W3B2	SH3 domain-containing protein(predicted) OS=Taenia asiatica OX=60517 PE=4 SV=1	0.056	Down	1.1867e-07	---	59.936
A0A0R3W3C6	Cytochrome c oxidase subunit 5B(predicted) OS=Taenia asiatica OX=60517 GN=TASK_LOCUS4413 PE=4 SV=1	0.246	Down	1.86692e-05	TASK_LOCUS4413	25.969
A0A0R3W3F0	Insulin growth factor binding(predicted) OS=Taenia asiatica OX=60517 GN=TASK_LOCUS4444 PE=4 SV=1	0.4	Down	0.00033799	TASK_LOCUS4444	30.44
A0A0R3W3H0	Immunogenic protein(predicted) OS=Taenia asiatica OX=60517 GN=TASK_LOCUS4466 PE=4 SV=1	0.269	Down	2.2734e-05	TASK_LOCUS4466	7.6595
A0A0R3W3J5	UBX domain-containing protein(predicted) OS=Taenia asiatica OX=60517 GN=TASK_LOCUS4493 PE=4 SV=2	0.398	Down	0.00030044	TASK_LOCUS4493	55.259
A0A0R3W3K7	Glutamine amidotransferase type-2 domain-containing protein(predicted) OS=Taenia asiatica OX=60517 GN=TASK_LOCUS4509 PE=4 SV=1	0.325	Down	6.1183e-05	TASK_LOCUS4509	48.999
A0A0R3W3M4	Transgelin OS=Taenia asiatica OX=60517 GN=TASK_LOCUS4536 PE=3 SV=1	0.233	Down	1.62791e-05	TASK_LOCUS4536	46.698
A0A0R3W406	Four and a half LIM domains protein 2(predicted) OS=Taenia asiatica OX=60517 GN=TASK_LOCUS4709 PE=4 SV=1	0.233	Down	1.63138e-05	TASK_LOCUS4709	26.402
A0A0R3W434	Major egg antigen(predicted) OS=Taenia asiatica OX=60517 GN=TASK_LOCUS4743 PE=3 SV=1	0.17	Down	2.2694e-06	TASK_LOCUS4743	35.878
A0A0R3W435	Major egg antigen(predicted) OS=Taenia asiatica OX=60517 GN=TASK_LOCUS4744 PE=3 SV=1	0.089	Down	3.3148e-07	TASK_LOCUS4744	51.783
A0A0R3W460	Septin-type G domain-containing protein(predicted) OS=Taenia asiatica OX=60517 GN=TASK_LOCUS4779 PE=3 SV=1	0.402	Down	0.0003396	TASK_LOCUS4779	20.16
A0A0R3W4E1	Cysteine and glycine rich protein 1(predicted) OS=Taenia asiatica OX=60517 GN=TASK_LOCUS4879 PE=4 SV=1	0.27	Down	2.3165e-05	TASK_LOCUS4879	19.575
A0A0R3W4I6	EF-hand domain-containing protein(predicted) OS=Taenia asiatica OX=60517 GN=TASK_LOCUS4949 PE=4 SV=1	0.474	Down	0.0061629	TASK_LOCUS4949	19.806
A0A0R3W4J7	Tegumental protein(predicted) OS=Taenia asiatica OX=60517 GN=TASK_LOCUS4962 PE=4 SV=1	0.013	Down	9.3635e-09	TASK_LOCUS4962	92.111
A0A0R3W4P0	Prosaposin a preproprotein(predicted) OS=Taenia asiatica OX=60517 GN=TASK_LOCUS5021 PE=4 SV=1	0.155	Down	1.7916e-06	TASK_LOCUS5021	95.385
A0A0R3W4W7	Dystrophins A:C:F:G:H(predicted) OS=Taenia asiatica OX=60517 PE=4 SV=3	0.431	Down	0.00092288	---	502.25
A0A0R3W542	Transket_pyr domain-containing protein(predicted) OS=Taenia asiatica OX=60517 GN=TASK_LOCUS5211 PE=4 SV=1	0.279	Down	3.761e-05	TASK_LOCUS5211	120.42
A0A0R3W557	Expressed conserved protein(predicted) OS=Taenia asiatica OX=60517 GN=TASK_LOCUS5233 PE=4 SV=1	0.424	Down	0.00078283	TASK_LOCUS5233	37.845
A0A0R3W560	FAD-binding FR-type domain-containing protein(predicted) OS=Taenia asiatica OX=60517 GN=TASK_LOCUS5236 PE=4 SV=1	0.385	Down	0.00024408	TASK_LOCUS5236	38.57
A0A0R3W593	Calcium binding protein(predicted) OS=Taenia asiatica OX=60517 GN=TASK_LOCUS5274 PE=4 SV=1	0.224	Down	4.6992e-06	TASK_LOCUS5274	17.493
A0A0R3W597	Sigma-type glutathione S-transferase(predicted) OS=Taenia asiatica OX=60517 GN=TASK_LOCUS5279 PE=4 SV=1	0.254	Down	2.0708e-05	TASK_LOCUS5279	24.327
A0A0R3W5F5	Lactamase_B domain-containing protein(predicted) OS=Taenia asiatica OX=60517 GN=TASK_LOCUS5350 PE=4 SV=1	0.036	Down	9.1487e-08	TASK_LOCUS5350	27.016
A0A0R3W5I8	MFS domain-containing protein(predicted) OS=Taenia asiatica OX=60517 GN=TASK_LOCUS5386 PE=3 SV=1	0.265	Down	2.1913e-05	TASK_LOCUS5386	59.22
A0A0R3W5P6	Ferritin OS=Taenia asiatica OX=60517 GN=TASK_LOCUS5455 PE=3 SV=1	0.455	Down	0.0036043	TASK_LOCUS5455	22.81
A0A0R3W5T6	Expressed conserved protein(predicted) OS=Taenia asiatica OX=60517 GN=TASK_LOCUS5504 PE=4 SV=1	0.37	Down	0.000175075	TASK_LOCUS5504	24.913
A0A0R3W5X1	Sepiapterin reductase(predicted) OS=Taenia asiatica OX=60517 GN=TASK_LOCUS5551 PE=4 SV=1	0.418	Down	0.00049862	TASK_LOCUS5551	38.909
A0A0R3W639	AH domain-containing protein(predicted) OS=Taenia asiatica OX=60517 GN=TASK_LOCUS5634 PE=4 SV=1	0.493	Down	0.023096	TASK_LOCUS5634	43.433
A0A0R3W648	Annexin B2(predicted) OS=Taenia asiatica OX=60517 PE=4 SV=1	0.215	Down	4.0144e-06	---	35.844
A0A0R3W6A3	GOLD domain-containing protein(predicted) OS=Taenia asiatica OX=60517 GN=TASK_LOCUS5713 PE=3 SV=1	0.495	Down	0.028345	TASK_LOCUS5713	24.446
A0A0R3W6A4	RNA binding protein Nova(predicted) OS=Taenia asiatica OX=60517 GN=TASK_LOCUS5714 PE=4 SV=2	0.481	Down	0.0113848	TASK_LOCUS5714	65.536
A0A0R3W6A5	Hypothetical transcript(predicted) OS=Taenia asiatica OX=60517 GN=TASK_LOCUS5715 PE=4 SV=1	0.435	Down	0.00109585	TASK_LOCUS5715	37.416
A0A0R3W6D3	SSD domain-containing protein(predicted) OS=Taenia asiatica OX=60517 PE=4 SV=1	0.348	Down	0.000102628	---	134.52
A0A0R3W6Q9	Dynein light chain OS=Taenia asiatica OX=60517 GN=TASK_LOCUS5903 PE=3 SV=1	0.153	Down	1.3751e-06	TASK_LOCUS5903	11.432
A0A0R3W6R0	Dynein light chain type 1 2(predicted) OS=Taenia asiatica OX=60517 GN=TASK_LOCUS5904 PE=4 SV=1	0.239	Down	1.74105e-05	TASK_LOCUS5904	10.458
A0A0R3W6V8	Dynein light chain OS=Taenia asiatica OX=60517 GN=TASK_LOCUS5960 PE=3 SV=1	0.332	Down	7.6878e-05	TASK_LOCUS5960	11.644
A0A0R3W6W9	Tropomyosin(predicted) OS=Taenia asiatica OX=60517 GN=TASK_LOCUS5973 PE=4 SV=1	0.296	Down	5.5067e-05	TASK_LOCUS5973	28.054
A0A0R3W7F2	Peptide methionine sulfoxide reductase msrA(predicted) OS=Taenia asiatica OX=60517 GN=TASK_LOCUS6203 PE=4 SV=1	0.36	Down	0.000138278	TASK_LOCUS6203	16.33
A0A0R3W7I7	Lysyl oxidase(predicted) OS=Taenia asiatica OX=60517 GN=TASK_LOCUS6246 PE=4 SV=1	0.313	Down	5.9616e-05	TASK_LOCUS6246	57.796
A0A0R3W7L6	Thioredoxin peroxidase(predicted) OS=Taenia asiatica OX=60517 GN=TASK_LOCUS6278 PE=4 SV=1	0.056	Down	1.0218e-07	TASK_LOCUS6278	42.997
A0A0R3W7Q2	G_PROTEIN_RECEP_F1_2 domain-containing protein(predicted) OS=Taenia asiatica OX=60517 GN=TASK_LOCUS6326 PE=3 SV=1	0.15	Down	1.109e-06	TASK_LOCUS6326	74.696
A0A0R3W7Y3	GRIP domain-containing protein(predicted) OS=Taenia asiatica OX=60517 GN=TASK_LOCUS6426 PE=4 SV=1	0.447	Down	0.00190249	TASK_LOCUS6426	94.953
A0A0R3W817	Protein-L-isoaspartate O-methyltransferase OS=Taenia asiatica OX=60517 GN=TASK_LOCUS6463 PE=3 SV=1	0.399	Down	0.00032487	TASK_LOCUS6463	24.403
A0A0R3W842	Protein AHNAK2(predicted) OS=Taenia asiatica OX=60517 GN=TASK_LOCUS6496 PE=4 SV=1	0.369	Down	0.000163861	TASK_LOCUS6496	57.401
A0A0R3W877	Protoporphyrinogen oxidase OS=Taenia asiatica OX=60517 GN=TASK_LOCUS6546 PE=3 SV=1	0.172	Down	2.5105e-06	TASK_LOCUS6546	56.672
A0A0R3W8C5	B-cell receptor-associated protein(predicted) OS=Taenia asiatica OX=60517 GN=TASK_LOCUS6601 PE=4 SV=1	0.467	Down	0.0044408	TASK_LOCUS6601	12.969
A0A0R3W8H9	Protein FAM91A1(predicted) OS=Taenia asiatica OX=60517 GN=TASK_LOCUS6666 PE=4 SV=1	0.484	Down	0.013378	TASK_LOCUS6666	88.851
A0A0R3W8K0	Pept_C1 domain-containing protein(predicted) OS=Taenia asiatica OX=60517 GN=TASK_LOCUS6696 PE=3 SV=1	0.486	Down	0.0167839	TASK_LOCUS6696	38.854
A0A0R3W8L9	Immunogenic protein(predicted) OS=Taenia asiatica OX=60517 GN=TASK_LOCUS6720 PE=4 SV=1	0.448	Down	0.0021787	TASK_LOCUS6720	11.376
A0A0R3W8Q1	FERM domain-containing protein(predicted) OS=Taenia asiatica OX=60517 GN=TASK_LOCUS6758 PE=4 SV=1	0.282	Down	3.8806e-05	TASK_LOCUS6758	78.622
A0A0R3W8S9	LIM and SH3 domain protein(predicted) OS=Taenia asiatica OX=60517 GN=TASK_LOCUS6794 PE=4 SV=1	0.27	Down	2.3322e-05	TASK_LOCUS6794	30.199
A0A0R3W8T8	Maspardin(predicted) OS=Taenia asiatica OX=60517 GN=TASK_LOCUS6807 PE=4 SV=1	0.423	Down	0.00070188	TASK_LOCUS6807	19.877
A0A0R3W968	IRS-type PTB domain-containing protein(predicted) OS=Taenia asiatica OX=60517 GN=TASK_LOCUS6968 PE=4 SV=1	0.389	Down	0.00027992	TASK_LOCUS6968	71.615
A0A0R3W9F1	MAGUK p55 subfamily(predicted) OS=Taenia asiatica OX=60517 GN=TASK_LOCUS7074 PE=4 SV=2	0.452	Down	0.0031647	TASK_LOCUS7074	92.706
A0A0R3W9I1	Beta-galactosidase OS=Taenia asiatica OX=60517 GN=TASK_LOCUS7110 PE=3 SV=2	0.278	Down	3.7434e-05	TASK_LOCUS7110	69.74
A0A0R3W9K2	Echinoderm microtubule associated protein1(predicted) OS=Taenia asiatica OX=60517 GN=TASK_LOCUS7139 PE=4 SV=1	0.468	Down	0.0046758	TASK_LOCUS7139	71.593
A0A0R3W9P9	Expressed protein(predicted) OS=Taenia asiatica OX=60517 GN=TASK_LOCUS7201 PE=4 SV=1	0.07	Down	1.2243e-07	TASK_LOCUS7201	111.23
A0A0R3W9R9	Putative peroxidase(predicted) OS=Taenia asiatica OX=60517 GN=TASK_LOCUS7225 PE=4 SV=1	0.362	Down	0.000143155	TASK_LOCUS7225	43.91
A0A0R3WA17	FAR1 domain-containing protein(predicted) OS=Taenia asiatica OX=60517 GN=TASK_LOCUS7348 PE=4 SV=2	0.132	Down	8.4524e-07	TASK_LOCUS7348	100.92
A0A0R3WA32	Dynactin subunit(predicted) OS=Taenia asiatica OX=60517 GN=TASK_LOCUS7365 PE=4 SV=1	0.336	Down	8.2041e-05	TASK_LOCUS7365	47.19
A0A0R3WA42	Aminotran_1_2 domain-containing protein(predicted) OS=Taenia asiatica OX=60517 GN=TASK_LOCUS7378 PE=4 SV=1	0.383	Down	0.00021661	TASK_LOCUS7378	58.062
A0A0R3WA72	Cytochrome b c1 complex subunit 2(predicted) OS=Taenia asiatica OX=60517 GN=TASK_LOCUS7420 PE=4 SV=1	0.285	Down	4.0581e-05	TASK_LOCUS7420	55.346
A0A0R3WAD6	GLTP domain-containing protein(predicted) OS=Taenia asiatica OX=60517 GN=TASK_LOCUS7504 PE=4 SV=1	0.346	Down	9.816e-05	TASK_LOCUS7504	23.857
A0A0R3WAE7	Sulfhydryl oxidase OS=Taenia asiatica OX=60517 GN=TASK_LOCUS7516 PE=4 SV=1	0.259	Down	2.175e-05	TASK_LOCUS7516	42.217
A0A0R3WAG0	Neurogenic locus notch protein(predicted) OS=Taenia asiatica OX=60517 GN=TASK_LOCUS7532 PE=4 SV=2	0.082	Down	2.0318e-07	TASK_LOCUS7532	333.16
A0A0R3WAH2	Expressed conserved protein(predicted) OS=Taenia asiatica OX=60517 GN=TASK_LOCUS7549 PE=4 SV=1	0.297	Down	5.5218e-05	TASK_LOCUS7549	24.349
A0A0R3WAM8	Pdz domain containing protein(predicted) OS=Taenia asiatica OX=60517 GN=TASK_LOCUS7620 PE=4 SV=1	0.448	Down	0.0024387	TASK_LOCUS7620	15.449
A0A0R3WAP4	Golgi phosphoprotein 3(predicted) OS=Taenia asiatica OX=60517 GN=TASK_LOCUS7639 PE=4 SV=1	0.369	Down	0.000160064	TASK_LOCUS7639	31.515
A0A0R3WAT1	AMP-binding domain-containing protein(predicted) OS=Taenia asiatica OX=60517 PE=4 SV=2	0.438	Down	0.00136003	---	72.058
A0A0R3WAV9	Expressed conserved protein(predicted) OS=Taenia asiatica OX=60517 GN=TASK_LOCUS7718 PE=4 SV=1	0.421	Down	0.00065744	TASK_LOCUS7718	204.37
A0A0R3WB05	RNA binding protein Nova 1(predicted) OS=Taenia asiatica OX=60517 GN=TASK_LOCUS7776 PE=4 SV=1	0.42	Down	0.00054432	TASK_LOCUS7776	51.907
A0A0R3WB12	Ufm1 specific protease 1(predicted) OS=Taenia asiatica OX=60517 GN=TASK_LOCUS7790 PE=4 SV=1	0.474	Down	0.0061566	TASK_LOCUS7790	26.559
A0A0R3WB47	Gamma-soluble NSF attachment protein(predicted) OS=Taenia asiatica OX=60517 GN=TASK_LOCUS7829 PE=4 SV=1	0.313	Down	5.9555e-05	TASK_LOCUS7829	31.805
A0A0R3WB48	ADP ribosylation factor binding protein GGA1(predicted) OS=Taenia asiatica OX=60517 GN=TASK_LOCUS7830 PE=4 SV=2	0.369	Down	0.00015961	TASK_LOCUS7830	72.361
A0A0R3WB74	acidPPc domain-containing protein(predicted) OS=Taenia asiatica OX=60517 GN=TASK_LOCUS7868 PE=4 SV=1	0.408	Down	0.00039811	TASK_LOCUS7868	36.585
A0A0R3WB82	EF-hand domain-containing protein(predicted) OS=Taenia asiatica OX=60517 GN=TASK_LOCUS7877 PE=4 SV=1	0.275	Down	3.6025e-05	TASK_LOCUS7877	43.494
A0A0R3WBE7	Dynein light chain OS=Taenia asiatica OX=60517 GN=TASK_LOCUS7962 PE=3 SV=3	0.487	Down	0.0188177	TASK_LOCUS7962	20.1
A0A0R3WBR1	I/LWEQ domain-containing protein(predicted) OS=Taenia asiatica OX=60517 GN=TASK_LOCUS8093 PE=4 SV=2	0.438	Down	0.0013579	TASK_LOCUS8093	85.91
A0A0R3WBS1	Ig-like domain-containing protein(predicted) OS=Taenia asiatica OX=60517 PE=4 SV=1	0.448	Down	0.0025156	---	20.276
A0A0R3WBT2	E3 ubiquitin protein ligase HECTD1(predicted) OS=Taenia asiatica OX=60517 GN=TASK_LOCUS8116 PE=4 SV=2	0.394	Down	0.00028441	TASK_LOCUS8116	305.25
A0A0R3WC83	cAMP-dependent protein kinase catalytic subunit alpha(predicted) OS=Taenia asiatica OX=60517 GN=TASK_LOCUS8303 PE=3 SV=1	0.328	Down	6.2599e-05	TASK_LOCUS8303	44.22
A0A0R3WC84	Isocitrate dehydrogenase [NADP] OS=Taenia asiatica OX=60517 GN=TASK_LOCUS8304 PE=3 SV=1	0.086	Down	2.7887e-07	TASK_LOCUS8304	46.132
A0A0R3WCG6	Methyltransf_11 domain-containing protein(predicted) OS=Taenia asiatica OX=60517 PE=4 SV=1	0.249	Down	1.91647e-05	---	67.099
A0A0R3WCM1	Excretion-secretion antigen m13(predicted) OS=Taenia asiatica OX=60517 GN=TASK_LOCUS8460 PE=4 SV=1	0.237	Down	1.68929e-05	TASK_LOCUS8460	9.8576
A0A0R3WCR5	Synaptotagmin-2(predicted) OS=Taenia asiatica OX=60517 GN=TASK_LOCUS8511 PE=4 SV=1	0.34	Down	8.3881e-05	TASK_LOCUS8511	43.687
A0A0R3WCS9	Syntaxin-binding protein(predicted) OS=Taenia asiatica OX=60517 GN=TASK_LOCUS8526 PE=3 SV=1	0.343	Down	8.4125e-05	TASK_LOCUS8526	80.206
A0A0R3WCU2	Expressed conserved protein(predicted) OS=Taenia asiatica OX=60517 GN=TASK_LOCUS8541 PE=4 SV=1	0.445	Down	0.00170094	TASK_LOCUS8541	43.154
A0A0R3WCX2	Inosine-5'-monophosphate dehydrogenase OS=Taenia asiatica OX=60517 GN=TASK_LOCUS8580 PE=3 SV=1	0.228	Down	1.54589e-05	TASK_LOCUS8580	56.894
A0A0R3WCY5	Alpha-carbonic anhydrase domain-containing protein(predicted) OS=Taenia asiatica OX=60517 GN=TASK_LOCUS8598 PE=3 SV=1	0.362	Down	0.000142416	TASK_LOCUS8598	26.908
A0A0R3WD21	Microtubule associated protein 1S(predicted) OS=Taenia asiatica OX=60517 GN=TASK_LOCUS8645 PE=4 SV=1	0.409	Down	0.00041524	TASK_LOCUS8645	108.74
A0A0R3WDE4	Gelsolin-like domain-containing protein(predicted) OS=Taenia asiatica OX=60517 GN=TASK_LOCUS8785 PE=4 SV=1	0.201	Down	3.7432e-06	TASK_LOCUS8785	42.149
A0A0R3WDG7	Thioredoxin domain-containing protein(predicted) OS=Taenia asiatica OX=60517 GN=TASK_LOCUS8810 PE=4 SV=1	0.353	Down	0.000121434	TASK_LOCUS8810	13.389
A0A0R3WDK3	Phospholipid hydroperoxide glutathione(predicted) OS=Taenia asiatica OX=60517 GN=TASK_LOCUS8849 PE=4 SV=1	0.393	Down	0.00028134	TASK_LOCUS8849	17.482
A0A0R3WE28	Rab3(predicted) OS=Taenia asiatica OX=60517 GN=TASK_LOCUS9051 PE=4 SV=1	0.204	Down	3.8605e-06	TASK_LOCUS9051	24.121
A0A0R3WE89	Deacetylase sirtuin-type domain-containing protein(predicted) OS=Taenia asiatica OX=60517 GN=TASK_LOCUS9122 PE=4 SV=1	0.202	Down	3.784e-06	TASK_LOCUS9122	33.498
A0A0R3WEK4	Nudix hydrolase domain-containing protein(predicted) OS=Taenia asiatica OX=60517 GN=TASK_LOCUS9257 PE=4 SV=1	0.384	Down	0.00024389	TASK_LOCUS9257	32.322
A0A0R3WEL3	AMP-binding domain-containing protein(predicted) OS=Taenia asiatica OX=60517 GN=TASK_LOCUS9266 PE=4 SV=1	0.155	Down	1.8493e-06	TASK_LOCUS9266	74.699
A0A0R3WEQ0	Peptidase_M16_C domain-containing protein(predicted) OS=Taenia asiatica OX=60517 PE=4 SV=1	0.187	Down	3.077e-06	---	42.105
A0A0R3WEQ8	Ras-related protein Rab-27A(predicted) OS=Taenia asiatica OX=60517 GN=TASK_LOCUS9317 PE=4 SV=1	0.186	Down	3.0238e-06	TASK_LOCUS9317	25.746
A0A0R3WES1	5-aminolevulinate synthase OS=Taenia asiatica OX=60517 GN=TASK_LOCUS9332 PE=3 SV=1	0.481	Down	0.010716	TASK_LOCUS9332	50.054
A0A0R3WEX6	Synaptotagmin(predicted) OS=Taenia asiatica OX=60517 GN=TASK_LOCUS9392 PE=4 SV=1	0.482	Down	0.0115231	TASK_LOCUS9392	48.822
A0A0R3WEX9	Delta-aminolevulinic acid dehydratase OS=Taenia asiatica OX=60517 PE=3 SV=1	0.079	Down	1.8817e-07	---	39.825
A0A0R3WF15	Transforming protein RhoA(predicted) OS=Taenia asiatica OX=60517 GN=TASK_LOCUS9438 PE=4 SV=1	0.494	Down	0.027884	TASK_LOCUS9438	22.055
A0A0R3WF80	ML domain-containing protein(predicted) OS=Taenia asiatica OX=60517 GN=TASK_LOCUS9518 PE=4 SV=1	0.295	Down	4.4688e-05	TASK_LOCUS9518	16.644
A0A0R3WFA1	Bravo_FIGEY domain-containing protein(predicted) OS=Taenia asiatica OX=60517 PE=4 SV=1	0.182	Down	2.9342e-06	---	142.7
A0A0R3WFA3	Peptidase S1 domain-containing protein(predicted) OS=Taenia asiatica OX=60517 GN=TASK_LOCUS9543 PE=3 SV=1	0.07	Down	1.2119e-07	TASK_LOCUS9543	53.902
A0A0R3WFC2	Tubulin polymerization promoting protein family(predicted) OS=Taenia asiatica OX=60517 GN=TASK_LOCUS9566 PE=4 SV=1	0.152	Down	1.2394e-06	TASK_LOCUS9566	18.244
A0A0R3WFF8	Partitioning defective protein 6(predicted) OS=Taenia asiatica OX=60517 GN=TASK_LOCUS9602 PE=4 SV=1	0.336	Down	8.2704e-05	TASK_LOCUS9602	34.583
A0A0R3WFH2	Calponin-homology (CH) domain-containing protein(predicted) OS=Taenia asiatica OX=60517 GN=TASK_LOCUS9616 PE=4 SV=1	0.25	Down	1.97951e-05	TASK_LOCUS9616	64.57
A0A0R3WFN1	Sodium driven chloride bicarbonate exchanger(predicted) OS=Taenia asiatica OX=60517 GN=TASK_LOCUS9675 PE=4 SV=1	0.407	Down	0.0003563	TASK_LOCUS9675	31.699
A0A0R3WG53	Mitogen-activated protein kinase OS=Taenia asiatica OX=60517 GN=TASK_LOCUS9847 PE=3 SV=1	0.381	Down	0.00020396	TASK_LOCUS9847	61.466
A0A0R3WG70	UDP N acetylhexosamine pyrophosphorylase(predicted) OS=Taenia asiatica OX=60517 GN=TASK_LOCUS9864 PE=4 SV=1	0.213	Down	4.0131e-06	TASK_LOCUS9864	46.211
A0A0R3WG90	Expressed conserved protein(predicted) OS=Taenia asiatica OX=60517 GN=TASK_LOCUS9884 PE=4 SV=1	0.303	Down	5.651e-05	TASK_LOCUS9884	23.922
A0A0R3WGA5	Fimbrin(predicted) OS=Taenia asiatica OX=60517 GN=TASK_LOCUS9899 PE=4 SV=1	0.372	Down	0.00017899	TASK_LOCUS9899	28.663
A0A0R3WGD8	6PGD domain-containing protein(predicted) OS=Taenia asiatica OX=60517 GN=TASK_LOCUS9932 PE=4 SV=1	0.231	Down	1.57352e-05	TASK_LOCUS9932	34.276
A0A0R3WGI1	Putative acid phosphatase 5(predicted) OS=Taenia asiatica OX=60517 GN=TASK_LOCUS9975 PE=3 SV=1	0.23	Down	1.56327e-05	TASK_LOCUS9975	39.356
A0A0R3WGQ9	Fimbrin:plastin(predicted) OS=Taenia asiatica OX=60517 GN=TASK_LOCUS10053 PE=4 SV=1	0.394	Down	0.00029794	TASK_LOCUS10053	40.115
A0A0R3WH00	DCC interacting protein 13 beta(predicted) OS=Taenia asiatica OX=60517 GN=TASK_LOCUS10144 PE=4 SV=1	0.347	Down	9.9781e-05	TASK_LOCUS10144	11.859
A0A0R3WHC3	Calcium binding mitochondrial carrier protein(predicted) OS=Taenia asiatica OX=60517 GN=TASK_LOCUS10267 PE=4 SV=1	0.407	Down	0.00037723	TASK_LOCUS10267	20.65
A0A158R6I1	Regulator of microtubule dynamics protein 3(predicted) OS=Taenia asiatica OX=60517 GN=TASK_LOCUS273 PE=4 SV=1	0.36	Down	0.000138974	TASK_LOCUS273	124.14
A0A158R6M9	Otoferlin(predicted) OS=Taenia asiatica OX=60517 GN=TASK_LOCUS541 PE=4 SV=1	0.178	Down	2.7293e-06	TASK_LOCUS541	247.53
A0A158R6X0	ANK_REP_REGION domain-containing protein(predicted) OS=Taenia asiatica OX=60517 GN=TASK_LOCUS1024 PE=4 SV=1	0.485	Down	0.0144779	TASK_LOCUS1024	17.23
A0A158R728	Oxalate:formate antiporter(predicted) OS=Taenia asiatica OX=60517 GN=TASK_LOCUS1415 PE=4 SV=1	0.462	Down	0.0038558	TASK_LOCUS1415	43.112
A0A158R755	EGF-like domain-containing protein(predicted) OS=Taenia asiatica OX=60517 GN=TASK_LOCUS1608 PE=4 SV=1	0.492	Down	0.020843	TASK_LOCUS1608	130
A0A158R767	Structural maintenance of chromosomes protein OS=Taenia asiatica OX=60517 PE=3 SV=1	0.302	Down	5.5902e-05	---	151.49
A0A158R773	Calpain A(predicted) OS=Taenia asiatica OX=60517 GN=TASK_LOCUS3297 PE=3 SV=1	0.141	Down	9.8397e-07	TASK_LOCUS3297	92.536
A0A158R7B6	Uncharacterized protein OS=Taenia asiatica OX=60517 GN=TASK_LOCUS3537 PE=4 SV=1	0.499	Down	0.045061	TASK_LOCUS3537	110.2
A0A158R7D9	Cation_ATPase_N domain-containing protein(predicted) OS=Taenia asiatica OX=60517 GN=TASK_LOCUS3676 PE=3 SV=1	0.12	Down	6.3427e-07	TASK_LOCUS3676	131.72
A0A158R7E9	SPRY domain containing protein(predicted) OS=Taenia asiatica OX=60517 GN=TASK_LOCUS3733 PE=4 SV=1	0.258	Down	2.1494e-05	TASK_LOCUS3733	149.08
A0A158R7R3	Phospholipase OS=Taenia asiatica OX=60517 GN=TASK_LOCUS4269 PE=3 SV=1	0.484	Down	0.0138817	TASK_LOCUS4269	169.03
A0A158R7V3	Titin(predicted) OS=Taenia asiatica OX=60517 GN=TASK_LOCUS4435 PE=4 SV=1	0.022	Down	1.4496e-08	TASK_LOCUS4435	107.87
A0A158R7V6	PDZ domain-containing protein(predicted) OS=Taenia asiatica OX=60517 GN=TASK_LOCUS4459 PE=4 SV=1	0.493	Down	0.024237	TASK_LOCUS4459	60.319
A0A158R7W3	Glutamate synthase(predicted) OS=Taenia asiatica OX=60517 GN=TASK_LOCUS4508 PE=4 SV=1	0.137	Down	8.7565e-07	TASK_LOCUS4508	195.6
A0A158R7Y4	Leucine rich repeat flightless interacting(predicted) OS=Taenia asiatica OX=60517 PE=4 SV=1	0.496	Down	0.03172	---	49.505
A0A158R847	Uncharacterized protein OS=Taenia asiatica OX=60517 GN=TASK_LOCUS4861 PE=4 SV=1	0.197	Down	3.4231e-06	TASK_LOCUS4861	96.124
A0A158R8B4	Protein kinase domain-containing protein(predicted) OS=Taenia asiatica OX=60517 GN=TASK_LOCUS5105 PE=3 SV=1	0.381	Down	0.00021528	TASK_LOCUS5105	35.099
A0A158R8C1	Filamin(predicted) OS=Taenia asiatica OX=60517 GN=TASK_LOCUS5142 PE=4 SV=1	0.118	Down	5.8347e-07	TASK_LOCUS5142	277.16
A0A158R8C9	Adenylate cyclase type 9(predicted) OS=Taenia asiatica OX=60517 GN=TASK_LOCUS5173 PE=4 SV=1	0.421	Down	0.00067906	TASK_LOCUS5173	132.89
A0A158R8E5	Alpha-actinin, sarcomeric(predicted) OS=Taenia asiatica OX=60517 GN=TASK_LOCUS5291 PE=4 SV=1	0.241	Down	1.75605e-05	TASK_LOCUS5291	107.61
A0A158R8E9	Coronin OS=Taenia asiatica OX=60517 GN=TASK_LOCUS5312 PE=3 SV=1	0.226	Down	4.9406e-06	TASK_LOCUS5312	55.971
A0A158R8F6	Fibulin(predicted) OS=Taenia asiatica OX=60517 GN=TASK_LOCUS5346 PE=4 SV=1	0.478	Down	0.0076563	TASK_LOCUS5346	91.579
A0A158R8M7	UMP CMP kinase(predicted) OS=Taenia asiatica OX=60517 GN=TASK_LOCUS5750 PE=3 SV=1	0.463	Down	0.0043406	TASK_LOCUS5750	23.174
A0A158R8P4	Nesprin-1(predicted) OS=Taenia asiatica OX=60517 GN=TASK_LOCUS5829 PE=4 SV=1	0.445	Down	0.00188118	TASK_LOCUS5829	444.55
A0A158R8R5	Vitellogenin domain-containing protein(predicted) OS=Taenia asiatica OX=60517 GN=TASK_LOCUS5967 PE=4 SV=1	0.018	Down	9.4725e-09	TASK_LOCUS5967	338.42
A0A158R8V5	Annexin OS=Taenia asiatica OX=60517 GN=TASK_LOCUS6159 PE=3 SV=1	0.373	Down	0.000179198	TASK_LOCUS6159	42.195
A0A158R8W6	Sarcoplasmic calcium binding protein(predicted) OS=Taenia asiatica OX=60517 GN=TASK_LOCUS6214 PE=4 SV=1	0.161	Down	1.869e-06	TASK_LOCUS6214	45.375
A0A158R8W8	CRAL-TRIO domain-containing protein(predicted) OS=Taenia asiatica OX=60517 GN=TASK_LOCUS6238 PE=4 SV=1	0.357	Down	0.000136696	TASK_LOCUS6238	38.402
A0A158R8X8	CRAL-TRIO domain-containing protein(predicted) OS=Taenia asiatica OX=60517 GN=TASK_LOCUS6313 PE=4 SV=1	0.458	Down	0.0038554	TASK_LOCUS6313	42.109
A0A158R8Y1	AMP-binding domain-containing protein(predicted) OS=Taenia asiatica OX=60517 GN=TASK_LOCUS6318 PE=4 SV=1	0.216	Down	4.3152e-06	TASK_LOCUS6318	77.603
A0A158R8Z1	Pribosyltran domain-containing protein(predicted) OS=Taenia asiatica OX=60517 GN=TASK_LOCUS6362 PE=4 SV=1	0.487	Down	0.0190429	TASK_LOCUS6362	18.063
A0A158R929	Vacuolar protein sorting 26 vps26(predicted) OS=Taenia asiatica OX=60517 GN=TASK_LOCUS6532 PE=4 SV=1	0.353	Down	0.000116599	TASK_LOCUS6532	88.509
A0A158R937	Bravo_FIGEY domain-containing protein(predicted) OS=Taenia asiatica OX=60517 GN=TASK_LOCUS6594 PE=4 SV=1	0.287	Down	4.1053e-05	TASK_LOCUS6594	85.693
A0A158R996	UDP-glucose 6-dehydrogenase OS=Taenia asiatica OX=60517 GN=TASK_LOCUS6882 PE=3 SV=1	0.272	Down	3.5395e-05	TASK_LOCUS6882	50.124
A0A158R9D7	Cyclin g associated kinase(predicted) OS=Taenia asiatica OX=60517 GN=TASK_LOCUS7085 PE=4 SV=1	0.498	Down	0.037863	TASK_LOCUS7085	102.22
A0A158R9E7	PPM-type phosphatase domain-containing protein(predicted) OS=Taenia asiatica OX=60517 GN=TASK_LOCUS7132 PE=4 SV=1	0.49	Down	0.0195992	TASK_LOCUS7132	94.628
A0A158R9F8	Phospholipid-transporting ATPase OS=Taenia asiatica OX=60517 GN=TASK_LOCUS7178 PE=3 SV=1	0.092	Down	3.6826e-07	TASK_LOCUS7178	120.46
A0A158R9H5	Rab-GAP TBC domain-containing protein(predicted) OS=Taenia asiatica OX=60517 PE=4 SV=1	0.426	Down	0.00089706	---	103.02
A0A158R9I7	cGMP dependent protein kinase(predicted) OS=Taenia asiatica OX=60517 GN=TASK_LOCUS7324 PE=4 SV=1	0.289	Down	4.1578e-05	TASK_LOCUS7324	97.656
A0A158R9P4	Synaptotagmin protein 4(predicted) OS=Taenia asiatica OX=60517 GN=TASK_LOCUS7561 PE=4 SV=1	0.176	Down	2.715e-06	TASK_LOCUS7561	81.69
A0A158R9P6	Cation_ATPase_C domain-containing protein(predicted) OS=Taenia asiatica OX=60517 GN=TASK_LOCUS7565 PE=3 SV=1	0.477	Down	0.0067605	TASK_LOCUS7565	71.237
A0A158R9R7	Cytochrome c1, heme protein(predicted) OS=Taenia asiatica OX=60517 GN=TASK_LOCUS7695 PE=4 SV=1	0.133	Down	8.5754e-07	TASK_LOCUS7695	30.645
A0A158R9S6	Expressed conserved protein(predicted) OS=Taenia asiatica OX=60517 GN=TASK_LOCUS7734 PE=4 SV=1	0.291	Down	4.2904e-05	TASK_LOCUS7734	29.072
A0A158R9U2	SH2 domain-containing protein(predicted) OS=Taenia asiatica OX=60517 GN=TASK_LOCUS7806 PE=4 SV=1	0.237	Down	1.68721e-05	TASK_LOCUS7806	160.26
A0A158R9X6	Dynein light chain(predicted) OS=Taenia asiatica OX=60517 GN=TASK_LOCUS7960 PE=4 SV=1	0.368	Down	0.00015855	TASK_LOCUS7960	52.65
A0A158RA25	Expressed conserved protein(predicted) OS=Taenia asiatica OX=60517 GN=TASK_LOCUS8272 PE=4 SV=1	0.478	Down	0.0091398	TASK_LOCUS8272	73.661
A0A158RA48	FERM domain-containing protein(predicted) OS=Taenia asiatica OX=60517 GN=TASK_LOCUS8432 PE=4 SV=1	0.495	Down	0.028344	TASK_LOCUS8432	48.578
A0A158RA58	UDENN domain-containing protein(predicted) OS=Taenia asiatica OX=60517 GN=TASK_LOCUS8515 PE=4 SV=1	0.404	Down	0.0003413	TASK_LOCUS8515	120.8
A0A158RA67	Expressed conserved protein(predicted) OS=Taenia asiatica OX=60517 GN=TASK_LOCUS8568 PE=4 SV=1	0.435	Down	0.00114211	TASK_LOCUS8568	51.852
A0A158RAC2	Papilin(predicted) OS=Taenia asiatica OX=60517 GN=TASK_LOCUS8965 PE=4 SV=1	0.28	Down	3.7854e-05	TASK_LOCUS8965	93.742
A0A158RAC5	Amidohydro-rel domain-containing protein(predicted) OS=Taenia asiatica OX=60517 PE=4 SV=1	0.418	Down	0.00051772	---	37.361
A0A158RAD1	Neurobeachin(predicted) OS=Taenia asiatica OX=60517 GN=TASK_LOCUS9020 PE=4 SV=1	0.198	Down	3.4762e-06	TASK_LOCUS9020	151.61
A0A158RAE0	Anion exchange protein(predicted) OS=Taenia asiatica OX=60517 PE=4 SV=1	0.328	Down	7.6268e-05	---	188.81
A0A0R3VS88	Translocon associated protein gamma subunit(predicted) OS=Taenia asiatica OX=60517 GN=TASK_LOCUS2 PE=4 SV=1	2.683	Up	0.0001836	TASK_LOCUS2	21.692
A0A0R3VSD4	Tyrosine-protein phosphatase domain-containing protein(predicted) OS=Taenia asiatica OX=60517 GN=TASK_LOCUS58 PE=4 SV=1	6.136	Up	0.0068179	TASK_LOCUS58	117.58
A0A0R3VSH2	AAA domain-containing protein(predicted) OS=Taenia asiatica OX=60517 GN=TASK_LOCUS109 PE=3 SV=1	2.183	Up	1.53828e-05	TASK_LOCUS109	71.174
A0A0R3VSI8	ER membrane protein complex subunit 3(predicted) OS=Taenia asiatica OX=60517 GN=TASK_LOCUS131 PE=4 SV=1	2.934	Up	0.00028247	TASK_LOCUS131	25.246
A0A0R3VSK8	60S ribosomal protein L3(predicted) OS=Taenia asiatica OX=60517 GN=TASK_LOCUS156 PE=3 SV=1	2.202	Up	1.67097e-05	TASK_LOCUS156	47.619
A0A0R3VSS4	Aldo_ket_red domain-containing protein(predicted) OS=Taenia asiatica OX=60517 GN=TASK_LOCUS234 PE=4 SV=1	2.581	Up	0.000104752	TASK_LOCUS234	35.327
A0A0R3VSZ5	Sister chromatid cohesion protein PDS5(predicted) OS=Taenia asiatica OX=60517 GN=TASK_LOCUS325 PE=4 SV=2	3.494	Up	0.00102119	TASK_LOCUS325	177.67
A0A0R3VT58	Ribosomal protein L15 OS=Taenia asiatica OX=60517 GN=TASK_LOCUS404 PE=3 SV=1	3.345	Up	0.00080096	TASK_LOCUS404	23.969
A0A0R3VT60	AAA domain-containing protein(predicted) OS=Taenia asiatica OX=60517 GN=TASK_LOCUS406 PE=4 SV=1	8.286	Up	0.0095995	TASK_LOCUS406	39.417
A0A0R3VTA6	NTF2 domain-containing protein(predicted) OS=Taenia asiatica OX=60517 GN=TASK_LOCUS459 PE=4 SV=1	2.887	Up	0.00026088	TASK_LOCUS459	84.541
A0A0R3VTD9	Transaldolase OS=Taenia asiatica OX=60517 GN=TASK_LOCUS497 PE=3 SV=1	2.041	Up	3.2166e-07	TASK_LOCUS497	36.296
A0A0R3VTE0	Nucleoporin_N domain-containing protein(predicted) OS=Taenia asiatica OX=60517 PE=4 SV=2	2.793	Up	0.00022343	---	175.83
A0A0R3VTN2	Cleavage and polyadenylation specificity factor subunit 5(predicted) OS=Taenia asiatica OX=60517 GN=TASK_LOCUS612 PE=4 SV=1	3.529	Up	0.0010576	TASK_LOCUS612	25.357
A0A0R3VTP7	Histone deacetylase OS=Taenia asiatica OX=60517 GN=TASK_LOCUS629 PE=3 SV=2	2.429	Up	7.6977e-05	TASK_LOCUS629	56.478
A0A0R3VTQ3	Dna directed rna polymerases i ii and iii(predicted) OS=Taenia asiatica OX=60517 GN=TASK_LOCUS636 PE=3 SV=2	3.122	Up	0.00050192	TASK_LOCUS636	24.193
A0A0R3VTS8	Developmentally-regulated GTP-binding protein(predicted) OS=Taenia asiatica OX=60517 GN=TASK_LOCUS666 PE=4 SV=1	38.993	Up	0.035825	TASK_LOCUS666	11.519
A0A0R3VU06	Glycerol-3-phosphate dehydrogenase OS=Taenia asiatica OX=60517 GN=TASK_LOCUS764 PE=3 SV=1	2.194	Up	1.65199e-05	TASK_LOCUS764	82.29
A0A0R3VUG6	Ribose 5 phosphate isomerase(predicted) OS=Taenia asiatica OX=60517 GN=TASK_LOCUS962 PE=4 SV=1	2.518	Up	7.984e-05	TASK_LOCUS962	26.14
A0A0R3VUI8	Small nuclear ribonucleoprotein E OS=Taenia asiatica OX=60517 GN=TASK_LOCUS990 PE=3 SV=1	8.014	Up	0.0094833	TASK_LOCUS990	9.2149
A0A0R3VUJ5	Large subunit ribosomal protein L41(predicted) OS=Taenia asiatica OX=60517 GN=TASK_LOCUS998 PE=4 SV=1	2.981	Up	0.00039615	TASK_LOCUS998	11.986
A0A0R3VUM7	ProRS-C_1 domain-containing protein(predicted) OS=Taenia asiatica OX=60517 GN=TASK_LOCUS1038 PE=4 SV=1	2.075	Up	5.413e-07	TASK_LOCUS1038	41.879
A0A0R3VUP8	Syndecan binding protein syntenin(predicted) OS=Taenia asiatica OX=60517 GN=TASK_LOCUS1065 PE=4 SV=1	4.351	Up	0.0028635	TASK_LOCUS1065	31.035
A0A0R3VUR9	Actin(predicted) OS=Taenia asiatica OX=60517 GN=TASK_LOCUS1089 PE=3 SV=2	2.94	Up	0.00028412	TASK_LOCUS1089	41.744
A0A0R3VUT3	Complement component 1 Q subcomponent binding(predicted) OS=Taenia asiatica OX=60517 GN=TASK_LOCUS1107 PE=4 SV=1	2.093	Up	8.283e-07	TASK_LOCUS1107	27.845
A0A0R3VUW5	CPSF_A domain-containing protein(predicted) OS=Taenia asiatica OX=60517 GN=TASK_LOCUS1142 PE=4 SV=1	2.591	Up	0.000120389	TASK_LOCUS1142	79.004
A0A0R3VV23	CYTOSOL_AP domain-containing protein(predicted) OS=Taenia asiatica OX=60517 GN=TASK_LOCUS1212 PE=4 SV=1	2.009	Up	7.679e-09	TASK_LOCUS1212	55.663
A0A0R3VV25	Acidic leucine rich nuclear phosphoprotein(predicted) OS=Taenia asiatica OX=60517 GN=TASK_LOCUS1214 PE=4 SV=1	29.607	Up	0.033817	TASK_LOCUS1214	31.9
A0A0R3VV40	WD40 repeat-containing protein SMU1(predicted) OS=Taenia asiatica OX=60517 GN=TASK_LOCUS1231 PE=4 SV=1	2.863	Up	0.00024228	TASK_LOCUS1231	56.917
A0A0R3VVI0	Ribosomal protein L11(predicted) OS=Taenia asiatica OX=60517 GN=TASK_LOCUS1395 PE=3 SV=1	2.904	Up	0.00026476	TASK_LOCUS1395	20.57
A0A0R3VVI3	Ectonucleotide pyrophosphatase/phosphodiesterase family member(predicted) OS=Taenia asiatica OX=60517 GN=TASK_LOCUS1398 PE=4 SV=1	5.66	Up	0.0056419	TASK_LOCUS1398	53.695
A0A0R3VVJ5	Ribosomal S15a protein(predicted) OS=Taenia asiatica OX=60517 GN=TASK_LOCUS1411 PE=3 SV=1	2.171	Up	4.2572e-06	TASK_LOCUS1411	14.988
A0A0R3VVL2	Hypothetical transcript(predicted) OS=Taenia asiatica OX=60517 GN=TASK_LOCUS1432 PE=4 SV=1	3.121	Up	0.00050029	TASK_LOCUS1432	59.96
A0A0R3VVZ2	Arginyl tRNA synthetase cytoplasmic(predicted) OS=Taenia asiatica OX=60517 GN=TASK_LOCUS1584 PE=3 SV=1	2.011	Up	1.9834e-08	TASK_LOCUS1584	75.637
A0A0R3VW22	SUMO-activating enzyme subunit(predicted) OS=Taenia asiatica OX=60517 GN=TASK_LOCUS1617 PE=4 SV=1	2.674	Up	0.000180862	TASK_LOCUS1617	84.889
A0A0R3VW23	OBG-type G domain-containing protein(predicted) OS=Taenia asiatica OX=60517 GN=TASK_LOCUS1618 PE=4 SV=1	2.376	Up	5.6221e-05	TASK_LOCUS1618	83.568
A0A0R3VW67	L-lactate dehydrogenase OS=Taenia asiatica OX=60517 GN=TASK_LOCUS1662 PE=3 SV=1	2.153	Up	2.7023e-06	TASK_LOCUS1662	35.299
A0A0R3VW71	Arsenite resistance protein 2(predicted) OS=Taenia asiatica OX=60517 GN=TASK_LOCUS1666 PE=4 SV=1	2.588	Up	0.000119639	TASK_LOCUS1666	109.03
A0A0R3VWI0	ATP-dependent RNA helicase DDX3Y(predicted) OS=Taenia asiatica OX=60517 GN=TASK_LOCUS1775 PE=3 SV=1	2.247	Up	1.82018e-05	TASK_LOCUS1775	71.857
A0A0R3VWM0	Tubulin beta chain OS=Taenia asiatica OX=60517 GN=TASK_LOCUS1815 PE=3 SV=1	2.416	Up	6.0824e-05	TASK_LOCUS1815	49.629
A0A0R3VWP0	Ribosomal_L18e/L15P domain-containing protein(predicted) OS=Taenia asiatica OX=60517 GN=TASK_LOCUS1835 PE=3 SV=1	2.75	Up	0.00022158	TASK_LOCUS1835	14.702
A0A0R3VWR0	Nudix hydrolase domain-containing protein(predicted) OS=Taenia asiatica OX=60517 GN=TASK_LOCUS1855 PE=4 SV=1	3.258	Up	0.00060481	TASK_LOCUS1855	69.918
A0A0R3VWY6	Phosducin domain-containing protein(predicted) OS=Taenia asiatica OX=60517 GN=TASK_LOCUS1931 PE=4 SV=1	26.027	Up	0.029579	TASK_LOCUS1931	22.455
A0A0R3VX07	Calbindin(predicted) OS=Taenia asiatica OX=60517 GN=TASK_LOCUS1952 PE=4 SV=1	2.156	Up	2.8763e-06	TASK_LOCUS1952	21.29
A0A0R3VX82	Nop domain-containing protein(predicted) OS=Taenia asiatica OX=60517 GN=TASK_LOCUS2027 PE=4 SV=1	2.713	Up	0.00020019	TASK_LOCUS2027	48.881
A0A0R3VXI9	tRNA-binding domain-containing protein(predicted) OS=Taenia asiatica OX=60517 GN=TASK_LOCUS2134 PE=4 SV=1	2.262	Up	1.89887e-05	TASK_LOCUS2134	23.787
A0A0R3VXK4	Major facilitator superfamily domain containing protein(predicted) OS=Taenia asiatica OX=60517 GN=TASK_LOCUS2149 PE=4 SV=1	2.65	Up	0.000138093	TASK_LOCUS2149	56.204
A0A0R3VXL4	Ig-like domain-containing protein(predicted) OS=Taenia asiatica OX=60517 GN=TASK_LOCUS2159 PE=4 SV=1	7.902	Up	0.0093364	TASK_LOCUS2159	49.837
A0A0R3VXU6	GalKase_gal_bdg domain-containing protein(predicted) OS=Taenia asiatica OX=60517 GN=TASK_LOCUS2241 PE=4 SV=1	2.165	Up	3.6627e-06	TASK_LOCUS2241	14.502
A0A0R3VY27	Dihydropyrimidine dehydrogenase [NADP(+)] OS=Taenia asiatica OX=60517 GN=TASK_LOCUS2322 PE=3 SV=1	2.672	Up	0.00017948	TASK_LOCUS2322	97.901
A0A0R3VY38	Major facilitator superfamily general substrate transporter(predicted) OS=Taenia asiatica OX=60517 GN=TASK_LOCUS2333 PE=4 SV=1	2.681	Up	0.00018234	TASK_LOCUS2333	17.466
A0A0R3VYB7	Folate_rec domain-containing protein(predicted) OS=Taenia asiatica OX=60517 GN=TASK_LOCUS2412 PE=4 SV=1	4.9	Up	0.0035212	TASK_LOCUS2412	20.979
A0A0R3VYN5	Signal recognition particle 9 kDa protein OS=Taenia asiatica OX=60517 GN=TASK_LOCUS2530 PE=3 SV=1	7.427	Up	0.0082602	TASK_LOCUS2530	9.2417
A0A0R3VYS6	Carbonyl reductase 1(predicted) OS=Taenia asiatica OX=60517 GN=TASK_LOCUS2571 PE=4 SV=1	3.669	Up	0.00158319	TASK_LOCUS2571	9.3777
A0A0R3VZ60	Galactokinase(predicted) OS=Taenia asiatica OX=60517 PE=4 SV=1	2.019	Up	2.4375e-08	---	32.678
A0A0R3VZ89	Tubulin polyglutamylase ttll4(predicted) OS=Taenia asiatica OX=60517 GN=TASK_LOCUS2734 PE=4 SV=1	2.41	Up	5.9324e-05	TASK_LOCUS2734	23.547
A0A0R3VZA6	Aldo_ket_red domain-containing protein(predicted) OS=Taenia asiatica OX=60517 GN=TASK_LOCUS2751 PE=4 SV=1	7.085	Up	0.0073984	TASK_LOCUS2751	24.759
A0A0R3VZE5	Aminotran_1_2 domain-containing protein(predicted) OS=Taenia asiatica OX=60517 GN=TASK_LOCUS2790 PE=4 SV=1	2.109	Up	1.5489e-06	TASK_LOCUS2790	20.438
A0A0R3VZR0	CPSF_A domain-containing protein(predicted) OS=Taenia asiatica OX=60517 GN=TASK_LOCUS2905 PE=4 SV=1	2.555	Up	9.9465e-05	TASK_LOCUS2905	37.624
A0A0R3W0D4	RBR-type E3 ubiquitin transferase OS=Taenia asiatica OX=60517 PE=3 SV=1	8.494	Up	0.0104841	---	29.462
A0A0R3W0H7	Apobec 1 complementation factor(predicted) OS=Taenia asiatica OX=60517 PE=4 SV=1	2.183	Up	4.9624e-06	---	35.75
A0A0R3W0Q9	DNA topoisomerase 2 OS=Taenia asiatica OX=60517 GN=TASK_LOCUS3262 PE=3 SV=2	2.942	Up	0.00029854	TASK_LOCUS3262	187.14
A0A0R3W0S7	DNA-directed RNA polymerase subunit beta OS=Taenia asiatica OX=60517 GN=TASK_LOCUS3287 PE=3 SV=1	3.237	Up	0.00059843	TASK_LOCUS3287	136.53
A0A0R3W0S9	STIP1 y and U box containing protein 1(predicted) OS=Taenia asiatica OX=60517 GN=TASK_LOCUS3289 PE=4 SV=1	17.75	Up	0.02344	TASK_LOCUS3289	38.012
A0A0R3W0V2	Mannosyltransferase OS=Taenia asiatica OX=60517 GN=TASK_LOCUS3321 PE=3 SV=1	3.098	Up	0.00044178	TASK_LOCUS3321	63.835
A0A0R3W0X0	Flap endonuclease 1 OS=Taenia asiatica OX=60517 GN=FEN1 PE=3 SV=1	5.45	Up	0.0042021	FEN1	41.337
A0A0R3W0X1	S1 motif domain-containing protein(predicted) OS=Taenia asiatica OX=60517 GN=TASK_LOCUS3347 PE=4 SV=1	3.267	Up	0.00065771	TASK_LOCUS3347	42.256
A0A0R3W115	Tubulin polymerization-promoting protein(predicted) OS=Taenia asiatica OX=60517 GN=TASK_LOCUS3399 PE=4 SV=1	2.417	Up	6.3156e-05	TASK_LOCUS3399	19.162
A0A0R3W119	Major vault protein(predicted) OS=Taenia asiatica OX=60517 GN=TASK_LOCUS3403 PE=4 SV=1	2.152	Up	2.4237e-06	TASK_LOCUS3403	100.05
A0A0R3W154	Tetraspanin OS=Taenia asiatica OX=60517 GN=TASK_LOCUS3447 PE=3 SV=1	4.231	Up	0.0027973	TASK_LOCUS3447	23.544
A0A0R3W185	Sodium/potassium-transporting ATPase subunit beta-1(predicted) OS=Taenia asiatica OX=60517 GN=TASK_LOCUS3479 PE=4 SV=1	2.388	Up	5.7049e-05	TASK_LOCUS3479	31.127
A0A0R3W187	40S ribosomal protein S8 OS=Taenia asiatica OX=60517 GN=TASK_LOCUS3482 PE=3 SV=1	2.214	Up	1.76855e-05	TASK_LOCUS3482	24.756
A0A0R3W190	Glycogen [starch] synthase OS=Taenia asiatica OX=60517 GN=TASK_LOCUS3485 PE=3 SV=2	2.053	Up	3.8537e-07	TASK_LOCUS3485	85.997
A0A0R3W1F0	NADH dehydrogenase ubiquinone 1 alpha(predicted) OS=Taenia asiatica OX=60517 GN=TASK_LOCUS3559 PE=4 SV=1	170.4	Up	0.044937	TASK_LOCUS3559	13.558
A0A0R3W1F3	RRM domain-containing protein(predicted) OS=Taenia asiatica OX=60517 GN=TASK_LOCUS3562 PE=4 SV=1	67.182	Up	0.0368	TASK_LOCUS3562	23.004
A0A0R3W1I4	Histone H4 OS=Taenia asiatica OX=60517 GN=TASK_LOCUS3598 PE=3 SV=1	2.274	Up	2.0693e-05	TASK_LOCUS3598	11.367
A0A0R3W1K9	Fe2OG dioxygenase domain-containing protein(predicted) OS=Taenia asiatica OX=60517 GN=TASK_LOCUS3627 PE=4 SV=1	2.057	Up	4.3919e-07	TASK_LOCUS3627	80.131
A0A0R3W1M1	PUR alpha beta gamma DNA RNA binding(predicted) OS=Taenia asiatica OX=60517 GN=TASK_LOCUS3644 PE=4 SV=1	2.531	Up	8.2419e-05	TASK_LOCUS3644	50.703
A0A0R3W1P3	Fibrillar collagen NC1 domain-containing protein(predicted) OS=Taenia asiatica OX=60517 GN=TASK_LOCUS3669 PE=4 SV=1	2.028	Up	4.4358e-08	TASK_LOCUS3669	123.24
A0A0R3W1U3	60S ribosomal protein L6 (Fragment)(predicted) OS=Taenia asiatica OX=60517 GN=TASK_LOCUS3730 PE=4 SV=1	2.666	Up	0.000160417	TASK_LOCUS3730	28.302
A0A0R3W1X7	Expressed conserved protein(predicted) OS=Taenia asiatica OX=60517 GN=TASK_LOCUS3772 PE=4 SV=1	4.056	Up	0.0024399	TASK_LOCUS3772	21.413
A0A0R3W1Y1	TPR_REGION domain-containing protein(predicted) OS=Taenia asiatica OX=60517 GN=TASK_LOCUS3776 PE=4 SV=1	2.106	Up	1.4621e-06	TASK_LOCUS3776	67.983
A0A0R3W243	60S ribosomal protein L32(predicted) OS=Taenia asiatica OX=60517 GN=TASK_LOCUS3849 PE=4 SV=1	3.364	Up	0.00084196	TASK_LOCUS3849	16.042
A0A0R3W246	NADP dependent malic enzyme(predicted) OS=Taenia asiatica OX=60517 GN=TASK_LOCUS3853 PE=4 SV=1	2.082	Up	6.618e-07	TASK_LOCUS3853	62.925
A0A0R3W248	Glycine cleavage system H protein OS=Taenia asiatica OX=60517 GN=TASK_LOCUS3855 PE=3 SV=1	25.427	Up	0.028577	TASK_LOCUS3855	14.631
A0A0R3W252	Tr-type G domain-containing protein(predicted) OS=Taenia asiatica OX=60517 GN=TASK_LOCUS3860 PE=4 SV=1	2.335	Up	4.0344e-05	TASK_LOCUS3860	110.42
A0A0R3W267	Phosphotransferase OS=Taenia asiatica OX=60517 GN=TASK_LOCUS3883 PE=3 SV=1	2.028	Up	4.4203e-08	TASK_LOCUS3883	51.575
A0A0R3W276	WD_REPEATS_REGION domain-containing protein(predicted) OS=Taenia asiatica OX=60517 GN=TASK_LOCUS3895 PE=4 SV=1	2.649	Up	0.000124962	TASK_LOCUS3895	49.481
A0A0R3W2G1	NADH dehydrogenase [ubiquinone] 1 beta subcomplex subunit(predicted) OS=Taenia asiatica OX=60517 GN=TASK_LOCUS4004 PE=3 SV=1	2.408	Up	5.8799e-05	TASK_LOCUS4004	17.403
A0A0R3W2J4	Hemicentin 1(predicted) OS=Taenia asiatica OX=60517 GN=TASK_LOCUS4047 PE=4 SV=2	2.01	Up	7.7123e-09	TASK_LOCUS4047	472.27
A0A0R3W2L8	H15 domain-containing protein(predicted) OS=Taenia asiatica OX=60517 GN=TASK_LOCUS4086 PE=3 SV=1	2.679	Up	0.000182178	TASK_LOCUS4086	21.012
A0A0R3W2T7	PHB domain-containing protein(predicted) OS=Taenia asiatica OX=60517 GN=TASK_LOCUS4173 PE=4 SV=1	2.957	Up	0.00031559	TASK_LOCUS4173	41.679
A0A0R3W2V2	Ribonucleoside-diphosphate reductase OS=Taenia asiatica OX=60517 GN=TASK_LOCUS4190 PE=3 SV=1	2.574	Up	0.00010166	TASK_LOCUS4190	91.384
A0A0R3W2W7	WD_REPEATS_REGION domain-containing protein(predicted) OS=Taenia asiatica OX=60517 GN=TASK_LOCUS4207 PE=4 SV=1	3.964	Up	0.0020234	TASK_LOCUS4207	38.137
A0A0R3W2Y4	Fibrillar collagen NC1 domain-containing protein(predicted) OS=Taenia asiatica OX=60517 GN=TASK_LOCUS4230 PE=4 SV=1	2.055	Up	3.9535e-07	TASK_LOCUS4230	123.64
A0A0R3W319	Glucose-regulated protein(predicted) OS=Taenia asiatica OX=60517 GN=TASK_LOCUS4273 PE=3 SV=1	2.065	Up	5.3893e-07	TASK_LOCUS4273	71.988
A0A0R3W373	Large subunit ribosomal protein l7e(predicted) OS=Taenia asiatica OX=60517 GN=TASK_LOCUS4345 PE=4 SV=1	3.5	Up	0.00102458	TASK_LOCUS4345	40.913
A0A0R3W381	Histone deacetylase complex subunit sap18(predicted) OS=Taenia asiatica OX=60517 GN=TASK_LOCUS4355 PE=4 SV=1	2.367	Up	4.3005e-05	TASK_LOCUS4355	24.912
A0A0R3W3C5	40S ribosomal protein S4 OS=Taenia asiatica OX=60517 GN=TASK_LOCUS4412 PE=3 SV=1	2.251	Up	1.86043e-05	TASK_LOCUS4412	30.378
A0A0R3W3E1	Solute carrier family 13(predicted) OS=Taenia asiatica OX=60517 PE=4 SV=1	2.283	Up	2.2879e-05	---	40.644
A0A0R3W3I5	WD_REPEATS_REGION domain-containing protein(predicted) OS=Taenia asiatica OX=60517 GN=TASK_LOCUS4481 PE=4 SV=1	2.587	Up	0.000116776	TASK_LOCUS4481	40.071
A0A0R3W3L6	PfkB domain-containing protein(predicted) OS=Taenia asiatica OX=60517 GN=TASK_LOCUS4524 PE=3 SV=1	3.262	Up	0.00064182	TASK_LOCUS4524	74.474
A0A0R3W3L7	60S ribosomal protein L36(predicted) OS=Taenia asiatica OX=60517 GN=TASK_LOCUS4525 PE=4 SV=1	3.317	Up	0.00075864	TASK_LOCUS4525	11.986
A0A0R3W3P7	Defective in cullin neddylation protein OS=Taenia asiatica OX=60517 GN=TASK_LOCUS4568 PE=4 SV=1	15.899	Up	0.018682	TASK_LOCUS4568	27.323
A0A0R3W3T4	Pyridoxal phosphate homeostasis protein OS=Taenia asiatica OX=60517 GN=TASK_LOCUS4612 PE=3 SV=1	2.373	Up	4.3176e-05	TASK_LOCUS4612	26.876
A0A0R3W3T8	zf-Tim10_DDP domain-containing protein(predicted) OS=Taenia asiatica OX=60517 GN=TASK_LOCUS4618 PE=3 SV=1	5.161	Up	0.0039781	TASK_LOCUS4618	11.859
A0A0R3W420	Lysine--tRNA ligase OS=Taenia asiatica OX=60517 GN=TASK_LOCUS4725 PE=3 SV=1	2.252	Up	1.86153e-05	TASK_LOCUS4725	66.937
A0A0R3W498	Ribosomal_L7Ae domain-containing protein(predicted) OS=Taenia asiatica OX=60517 GN=TASK_LOCUS4828 PE=4 SV=1	2.197	Up	1.66533e-05	TASK_LOCUS4828	33.496
A0A0R3W4A4	PPM-type phosphatase domain-containing protein(predicted) OS=Taenia asiatica OX=60517 GN=TASK_LOCUS4835 PE=4 SV=1	3.454	Up	0.00099632	TASK_LOCUS4835	69.249
A0A0R3W4C2	CN hydrolase domain-containing protein(predicted) OS=Taenia asiatica OX=60517 GN=TASK_LOCUS4857 PE=4 SV=1	2.141	Up	2.3407e-06	TASK_LOCUS4857	40.368
A0A0R3W4H6	Barrier-to-autointegration factor(predicted) OS=Taenia asiatica OX=60517 GN=TASK_LOCUS4933 PE=4 SV=1	2.886	Up	0.00025898	TASK_LOCUS4933	10.225
A0A0R3W4M0	40S ribosomal protein S15(predicted) OS=Taenia asiatica OX=60517 GN=TASK_LOCUS4988 PE=3 SV=1	3.283	Up	0.00068134	TASK_LOCUS4988	17.068
A0A0R3W4P3	Aamy domain-containing protein(predicted) OS=Taenia asiatica OX=60517 GN=TASK_LOCUS5024 PE=4 SV=1	2.036	Up	2.2351e-07	TASK_LOCUS5024	63.492
A0A0R3W4Q7	Putative pre-mRNA-splicing factor ATP-dependent RNA helicase DHX15(predicted) OS=Taenia asiatica OX=60517 GN=TASK_LOCUS5045 PE=4 SV=1	2.117	Up	1.6768e-06	TASK_LOCUS5045	82.821
A0A0R3W4Q8	Succinate--CoA ligase [ADP/GDP-forming] subunit alpha, mitochondrial OS=Taenia asiatica OX=60517 GN=TASK_LOCUS5047 PE=3 SV=1	2.425	Up	7.6087e-05	TASK_LOCUS5047	33.243
A0A0R3W4V2	Calponin-homology (CH) domain-containing protein(predicted) OS=Taenia asiatica OX=60517 GN=TASK_LOCUS5104 PE=4 SV=1	2.566	Up	9.9578e-05	TASK_LOCUS5104	24.75
A0A0R3W4V7	DNA RNA helicase C terminal(predicted) OS=Taenia asiatica OX=60517 GN=TASK_LOCUS5111 PE=4 SV=1	21.137	Up	0.024798	TASK_LOCUS5111	156.42
A0A0R3W507	Signal recognition particle protein(predicted) OS=Taenia asiatica OX=60517 GN=TASK_LOCUS5175 PE=4 SV=1	2.903	Up	0.00026469	TASK_LOCUS5175	16.485
A0A0R3W527	Pre mRNA processing factor 40 A(predicted) OS=Taenia asiatica OX=60517 GN=TASK_LOCUS5196 PE=4 SV=1	2.288	Up	2.355e-05	TASK_LOCUS5196	93.626
A0A0R3W537	SH3 domain-containing protein(predicted) OS=Taenia asiatica OX=60517 GN=TASK_LOCUS5206 PE=4 SV=1	2.534	Up	8.4934e-05	TASK_LOCUS5206	77.043
A0A0R3W561	Small nuclear ribonucleoprotein G OS=Taenia asiatica OX=60517 GN=TASK_LOCUS5237 PE=3 SV=1	2.233	Up	1.7764e-05	TASK_LOCUS5237	8.6449
A0A0R3W563	Replication factor C 38 kDa subunit(predicted) OS=Taenia asiatica OX=60517 GN=TASK_LOCUS5239 PE=4 SV=1	2.334	Up	3.6544e-05	TASK_LOCUS5239	40.411
A0A0R3W5E2	Expressed conserved protein(predicted) OS=Taenia asiatica OX=60517 GN=TASK_LOCUS5335 PE=4 SV=1	2.309	Up	2.4721e-05	TASK_LOCUS5335	47.509
A0A0R3W5G6	Plug_translocon domain-containing protein(predicted) OS=Taenia asiatica OX=60517 PE=3 SV=2	2.86	Up	0.00024186	---	54.054
A0A0R3W5G9	Actin(predicted) OS=Taenia asiatica OX=60517 GN=TASK_LOCUS5366 PE=3 SV=1	2.979	Up	0.00037602	TASK_LOCUS5366	41.831
A0A0R3W5K0	NADH dehydrogenase ubiquinone 1 beta(predicted) OS=Taenia asiatica OX=60517 GN=TASK_LOCUS5399 PE=4 SV=1	2.532	Up	8.3396e-05	TASK_LOCUS5399	13.988
A0A0R3W5N1	Purine nucleoside phosphorylase OS=Taenia asiatica OX=60517 GN=TASK_LOCUS5438 PE=3 SV=1	2.805	Up	0.00023658	TASK_LOCUS5438	32.924
A0A0R3W5S9	Yl amino acid transporter 2(predicted) OS=Taenia asiatica OX=60517 GN=TASK_LOCUS5496 PE=4 SV=1	2.364	Up	4.2305e-05	TASK_LOCUS5496	53.59
A0A0R3W5T1	Protein polybromo-1(predicted) OS=Taenia asiatica OX=60517 GN=TASK_LOCUS5499 PE=4 SV=2	180.848	Up	0.04724	TASK_LOCUS5499	256.07
A0A0R3W5T9	PPIase cyclophilin-type domain-containing protein(predicted) OS=Taenia asiatica OX=60517 GN=TASK_LOCUS5508 PE=4 SV=1	17.519	Up	0.020024	TASK_LOCUS5508	92.993
A0A0R3W5Y5	Flavokinase domain-containing protein(predicted) OS=Taenia asiatica OX=60517 GN=TASK_LOCUS5568 PE=4 SV=2	5.866	Up	0.0063371	TASK_LOCUS5568	333.2
A0A0R3W634	DNA-directed RNA polymerase subunit OS=Taenia asiatica OX=60517 GN=TASK_LOCUS5628 PE=3 SV=1	3.983	Up	0.0021982	TASK_LOCUS5628	204.24
A0A0R3W640	Integrin_alpha2 domain-containing protein(predicted) OS=Taenia asiatica OX=60517 GN=TASK_LOCUS5635 PE=3 SV=2	2.026	Up	4.3113e-08	TASK_LOCUS5635	135.28
A0A0R3W649	C2H2-type domain-containing protein(predicted) OS=Taenia asiatica OX=60517 GN=TASK_LOCUS5645 PE=4 SV=1	2.804	Up	0.00022422	TASK_LOCUS5645	41.257
A0A0R3W664	Protein pelota homolog OS=Taenia asiatica OX=60517 GN=TASK_LOCUS5663 PE=3 SV=1	2.325	Up	3.6272e-05	TASK_LOCUS5663	43.343
A0A0R3W6E2	ATP dependent RNA helicase me31b(predicted) OS=Taenia asiatica OX=60517 GN=TASK_LOCUS5760 PE=3 SV=1	2.955	Up	0.00030082	TASK_LOCUS5760	50.66
A0A0R3W6E9	B30.2/SPRY domain-containing protein(predicted) OS=Taenia asiatica OX=60517 PE=4 SV=1	2.599	Up	0.000121915	---	54.178
A0A0R3W6Z5	AAA domain-containing protein(predicted) OS=Taenia asiatica OX=60517 GN=TASK_LOCUS6007 PE=4 SV=1	3.532	Up	0.0010764	TASK_LOCUS6007	39.818
A0A0R3W759	Mitochondrial pyruvate carrier OS=Taenia asiatica OX=60517 GN=TASK_LOCUS6090 PE=3 SV=1	2.16	Up	3.5159e-06	TASK_LOCUS6090	13.49
A0A0R3W773	Transmembrane protein(predicted) OS=Taenia asiatica OX=60517 GN=TASK_LOCUS6107 PE=4 SV=1	3.594	Up	0.00132085	TASK_LOCUS6107	36.985
A0A0R3W7C7	Calumenin-B(predicted) OS=Taenia asiatica OX=60517 GN=TASK_LOCUS6172 PE=4 SV=1	2.098	Up	9.6113e-07	TASK_LOCUS6172	37.244
A0A0R3W7D6	ATP dependent RNA helicase DDX5(predicted) OS=Taenia asiatica OX=60517 GN=TASK_LOCUS6184 PE=3 SV=1	2.212	Up	1.71712e-05	TASK_LOCUS6184	82.919
A0A0R3W7G4	Proliferating cell nuclear antigen OS=Taenia asiatica OX=60517 GN=TASK_LOCUS6219 PE=3 SV=1	4.4	Up	0.003222	TASK_LOCUS6219	28.396
A0A0R3W7I8	Ribosomal protein l5(predicted) OS=Taenia asiatica OX=60517 GN=TASK_LOCUS6247 PE=3 SV=1	2.104	Up	1.2563e-06	TASK_LOCUS6247	75.159
A0A0R3W7K4	Phosphatase 2a inhibitor i2pp2a(predicted) OS=Taenia asiatica OX=60517 GN=TASK_LOCUS6264 PE=3 SV=1	2.078	Up	6.3634e-07	TASK_LOCUS6264	33.95
A0A0R3W7K9	3 oxoacyl acyl carrier protein reductase(predicted) OS=Taenia asiatica OX=60517 GN=TASK_LOCUS6269 PE=4 SV=1	2.137	Up	2.294e-06	TASK_LOCUS6269	30.402
A0A0R3W7Q8	Mitochondrial import receptor subunit tom40(predicted) OS=Taenia asiatica OX=60517 GN=TASK_LOCUS6332 PE=4 SV=1	19.274	Up	0.023904	TASK_LOCUS6332	34.483
A0A0R3W7R2	Phosphoacetylglucosamine mutase(predicted) OS=Taenia asiatica OX=60517 GN=TASK_LOCUS6337 PE=4 SV=2	2.036	Up	2.3694e-07	TASK_LOCUS6337	71.542
A0A0R3W7S9	Mitochondrial processing peptidase(predicted) OS=Taenia asiatica OX=60517 GN=TASK_LOCUS6355 PE=3 SV=1	2.388	Up	5.7035e-05	TASK_LOCUS6355	56.733
A0A0R3W7X6	AAA family ATPase(predicted) OS=Taenia asiatica OX=60517 GN=TASK_LOCUS6419 PE=4 SV=2	2.736	Up	0.00021901	TASK_LOCUS6419	93.353
A0A0R3W7Y8	Biotin protein ligase(predicted) OS=Taenia asiatica OX=60517 GN=TASK_LOCUS6431 PE=4 SV=1	2.797	Up	0.00022388	TASK_LOCUS6431	42.321
A0A0R3W7Z4	RNB domain-containing protein(predicted) OS=Taenia asiatica OX=60517 GN=TASK_LOCUS6437 PE=3 SV=1	7.499	Up	0.008845	TASK_LOCUS6437	133.1
A0A0R3W7Z5	60S ribosomal protein L13 OS=Taenia asiatica OX=60517 GN=TASK_LOCUS6439 PE=3 SV=1	2.516	Up	7.9374e-05	TASK_LOCUS6439	23.381
A0A0R3W7Z8	26S proteasome non-ATPase regulatory subunit 1 OS=Taenia asiatica OX=60517 GN=TASK_LOCUS6442 PE=3 SV=2	2.206	Up	1.69772e-05	TASK_LOCUS6442	131.38
A0A0R3W809	J domain-containing protein(predicted) OS=Taenia asiatica OX=60517 GN=TASK_LOCUS6454 PE=4 SV=2	2.971	Up	0.00034494	TASK_LOCUS6454	30.544
A0A0R3W814	Solute carrier family 5(predicted) OS=Taenia asiatica OX=60517 GN=TASK_LOCUS6459 PE=3 SV=1	2.047	Up	3.5938e-07	TASK_LOCUS6459	75.474
A0A0R3W830	Ribosomal_L7Ae domain-containing protein(predicted) OS=Taenia asiatica OX=60517 GN=TASK_LOCUS6481 PE=4 SV=1	2.651	Up	0.000143367	TASK_LOCUS6481	16.803
A0A0R3W898	Structural maintenance of chromosomes protein OS=Taenia asiatica OX=60517 PE=3 SV=2	2.245	Up	1.77843e-05	---	149.41
A0A0R3W8F0	Histone H2A OS=Taenia asiatica OX=60517 GN=TASK_LOCUS6631 PE=3 SV=1	23.494	Up	0.025145	TASK_LOCUS6631	16.61
A0A0R3W8I5	TPR_MLP1_2 domain-containing protein(predicted) OS=Taenia asiatica OX=60517 GN=TASK_LOCUS6674 PE=4 SV=1	5.608	Up	0.0044426	TASK_LOCUS6674	261.79
A0A0R3W8L3	La protein 7(predicted) OS=Taenia asiatica OX=60517 GN=TASK_LOCUS6712 PE=4 SV=1	17.405	Up	0.0191622	TASK_LOCUS6712	109.04
A0A0R3W8S3	Dehydrogenase/reductase SDR family member(predicted) OS=Taenia asiatica OX=60517 GN=TASK_LOCUS6787 PE=3 SV=1	2.038	Up	2.7267e-07	TASK_LOCUS6787	38.065
A0A0R3W8X0	Ribosomal protein OS=Taenia asiatica OX=60517 PE=3 SV=1	3.666	Up	0.00156156	---	26.129
A0A0R3W8Z7	WD_REPEATS_REGION domain-containing protein(predicted) OS=Taenia asiatica OX=60517 GN=TASK_LOCUS6881 PE=4 SV=1	9.206	Up	0.0124029	TASK_LOCUS6881	68.992
A0A0R3W929	Homocysteine S-methyltransferase 1(predicted) OS=Taenia asiatica OX=60517 GN=TASK_LOCUS6922 PE=4 SV=1	7.242	Up	0.0075803	TASK_LOCUS6922	101.9
A0A0R3W9E4	COQ9 domain-containing protein(predicted) OS=Taenia asiatica OX=60517 GN=TASK_LOCUS7064 PE=4 SV=2	2.089	Up	7.2947e-07	TASK_LOCUS7064	36.455
A0A0R3W9E8	SLC3A2_N domain-containing protein(predicted) OS=Taenia asiatica OX=60517 GN=TASK_LOCUS7071 PE=4 SV=1	2.014	Up	2.4141e-08	TASK_LOCUS7071	13.561
A0A0R3W9H0	RuvB-like helicase OS=Taenia asiatica OX=60517 GN=TASK_LOCUS7098 PE=3 SV=1	2.356	Up	4.1294e-05	TASK_LOCUS7098	51.987
A0A0R3W9J0	Coenzyme q10 biosynthesis protein(predicted) OS=Taenia asiatica OX=60517 GN=TASK_LOCUS7121 PE=4 SV=1	2.203	Up	1.6847e-05	TASK_LOCUS7121	20.44
A0A0R3W9K3	Lactamase_B domain-containing protein(predicted) OS=Taenia asiatica OX=60517 GN=TASK_LOCUS7140 PE=4 SV=1	5.33	Up	0.0041793	TASK_LOCUS7140	38.858
A0A0R3W9M4	Phosphoglucomutase 2(predicted) OS=Taenia asiatica OX=60517 GN=TASK_LOCUS7166 PE=3 SV=1	2.032	Up	1.2447e-07	TASK_LOCUS7166	67.612
A0A0R3W9M6	Protein CHMP7(predicted) OS=Taenia asiatica OX=60517 GN=TASK_LOCUS7169 PE=4 SV=1	3.071	Up	0.00044155	TASK_LOCUS7169	51.747
A0A0R3W9M7	AcetylCoA_hyd_C domain-containing protein(predicted) OS=Taenia asiatica OX=60517 GN=TASK_LOCUS7170 PE=4 SV=1	2.091	Up	8.1651e-07	TASK_LOCUS7170	51.437
A0A0R3W9M8	ATP dependent RNA helicase DDX52(predicted) OS=Taenia asiatica OX=60517 GN=TASK_LOCUS7172 PE=4 SV=1	2.177	Up	4.5319e-06	TASK_LOCUS7172	108.59
A0A0R3W9Q7	Protein argonaute-2(predicted) OS=Taenia asiatica OX=60517 GN=TASK_LOCUS7210 PE=3 SV=1	12.336	Up	0.0182358	TASK_LOCUS7210	126.58
A0A0R3W9U3	Carrier domain-containing protein(predicted) OS=Taenia asiatica OX=60517 GN=TASK_LOCUS7252 PE=4 SV=1	2.47	Up	7.8697e-05	TASK_LOCUS7252	99.359
A0A0R3W9W3	Fibrillar collagen NC1 domain-containing protein(predicted) OS=Taenia asiatica OX=60517 GN=TASK_LOCUS7280 PE=4 SV=1	2.09	Up	7.4529e-07	TASK_LOCUS7280	133.31
A0A0R3W9W4	Fibrillar collagen NC1 domain-containing protein(predicted) OS=Taenia asiatica OX=60517 GN=TASK_LOCUS7281 PE=4 SV=1	2.057	Up	4.6502e-07	TASK_LOCUS7281	115.76
A0A0R3W9X3	Ribonucleoside diphosphate reductase subunit(predicted) OS=Taenia asiatica OX=60517 GN=TASK_LOCUS7294 PE=4 SV=1	2.17	Up	4.1895e-06	TASK_LOCUS7294	38.66
A0A0R3W9Z3	PNP_UDP_1 domain-containing protein(predicted) OS=Taenia asiatica OX=60517 GN=TASK_LOCUS7315 PE=4 SV=1	2.001	Up	4.536e-09	TASK_LOCUS7315	33.485
A0A0R3WA18	Annexin OS=Taenia asiatica OX=60517 PE=3 SV=1	5.725	Up	0.0057626	---	65.048
A0A0R3WA84	Splicing factor arginine:serine rich 4(predicted) OS=Taenia asiatica OX=60517 GN=TASK_LOCUS7434 PE=4 SV=1	2.858	Up	0.00023955	TASK_LOCUS7434	41.081
A0A0R3WA94	Beta-lactamase domain-containing protein(predicted) OS=Taenia asiatica OX=60517 GN=TASK_LOCUS7448 PE=4 SV=1	2.425	Up	7.6115e-05	TASK_LOCUS7448	40.177
A0A0R3WAE9	Calumenin-A(predicted) OS=Taenia asiatica OX=60517 PE=4 SV=1	2.571	Up	0.000100438	---	28.257
A0A0R3WAF8	Protein kinase domain-containing protein(predicted) OS=Taenia asiatica OX=60517 GN=TASK_LOCUS7529 PE=3 SV=1	2.453	Up	7.8563e-05	TASK_LOCUS7529	43.394
A0A0R3WAQ4	Brix domain-containing protein(predicted) OS=Taenia asiatica OX=60517 GN=TASK_LOCUS7651 PE=4 SV=1	2.969	Up	0.0003432	TASK_LOCUS7651	32.264
A0A0R3WAR2	Ribosome biolocus tagsis protein BMS1(predicted) OS=Taenia asiatica OX=60517 GN=TASK_LOCUS7661 PE=4 SV=2	43.118	Up	0.036556	TASK_LOCUS7661	137.75
A0A0R3WAT2	RRM domain-containing protein(predicted) OS=Taenia asiatica OX=60517 PE=4 SV=1	3.167	Up	0.00052318	---	27.947
A0A0R3WAY1	Tetraspanin OS=Taenia asiatica OX=60517 GN=TASK_LOCUS7749 PE=3 SV=1	2.401	Up	5.8468e-05	TASK_LOCUS7749	23.191
A0A0R3WB30	MIF4G domain-containing protein(predicted) OS=Taenia asiatica OX=60517 GN=TASK_LOCUS7812 PE=4 SV=1	2.856	Up	0.00023793	TASK_LOCUS7812	111.51
A0A0R3WB31	Nop domain-containing protein(predicted) OS=Taenia asiatica OX=60517 GN=TASK_LOCUS7813 PE=4 SV=1	2.427	Up	7.6872e-05	TASK_LOCUS7813	63.824
A0A0R3WB41	RuvB-like helicase OS=Taenia asiatica OX=60517 GN=TASK_LOCUS7823 PE=3 SV=1	2.177	Up	4.7254e-06	TASK_LOCUS7823	50.545
A0A0R3WB55	Autophagy-related protein 3 OS=Taenia asiatica OX=60517 GN=TASK_LOCUS7840 PE=3 SV=1	2.099	Up	1.0774e-06	TASK_LOCUS7840	37.602
A0A0R3WB77	Purine nucleoside phosphorylase OS=Taenia asiatica OX=60517 GN=TASK_LOCUS7871 PE=3 SV=1	5.007	Up	0.0036187	TASK_LOCUS7871	30.447
A0A0R3WBA6	Tetraspanin OS=Taenia asiatica OX=60517 PE=3 SV=1	30.579	Up	0.03504	---	30.617
A0A0R3WBB3	CMP/dCMP-type deaminase domain-containing protein(predicted) OS=Taenia asiatica OX=60517 GN=TASK_LOCUS7921 PE=4 SV=1	3.731	Up	0.0016357	TASK_LOCUS7921	57.622
A0A0R3WBB5	DHFR domain-containing protein(predicted) OS=Taenia asiatica OX=60517 GN=TASK_LOCUS7924 PE=4 SV=1	6.538	Up	0.0072767	TASK_LOCUS7924	18.361
A0A0R3WBD7	Translocon-associated protein subunit beta(predicted) OS=Taenia asiatica OX=60517 GN=TASK_LOCUS7947 PE=4 SV=1	2.667	Up	0.000177236	TASK_LOCUS7947	19.349
A0A0R3WBG8	Metal dependent protein hydrolase(predicted) OS=Taenia asiatica OX=60517 GN=TASK_LOCUS7983 PE=4 SV=1	2.27	Up	2.0583e-05	TASK_LOCUS7983	38.972
A0A0R3WBK6	Thymidylat_synt domain-containing protein(predicted) OS=Taenia asiatica OX=60517 GN=TASK_LOCUS8029 PE=3 SV=1	29.457	Up	0.033756	TASK_LOCUS8029	35.636
A0A0R3WBM4	M20_dimer domain-containing protein(predicted) OS=Taenia asiatica OX=60517 GN=TASK_LOCUS8050 PE=4 SV=1	2.024	Up	4.231e-08	TASK_LOCUS8050	61.296
A0A0R3WBN7	ZZ-type domain-containing protein(predicted) OS=Taenia asiatica OX=60517 GN=TASK_LOCUS8064 PE=4 SV=1	3.389	Up	0.00092353	TASK_LOCUS8064	43.624
A0A0R3WBX2	Indoleamine 2,3-dioxygenase(predicted) OS=Taenia asiatica OX=60517 GN=TASK_LOCUS8164 PE=4 SV=1	2.128	Up	2.2616e-06	TASK_LOCUS8164	43.917
A0A0R3WBZ8	Phosphatidylserine decarboxylase(predicted) OS=Taenia asiatica OX=60517 GN=TASK_LOCUS8194 PE=4 SV=1	10.132	Up	0.0147002	TASK_LOCUS8194	33.63
A0A0R3WC08	Ribosomal_L2_C domain-containing protein(predicted) OS=Taenia asiatica OX=60517 GN=TASK_LOCUS8210 PE=4 SV=2	3.855	Up	0.00194322	TASK_LOCUS8210	104.03
A0A0R3WC97	Isoleucyl-tRNA synthetase(predicted) OS=Taenia asiatica OX=60517 GN=TASK_LOCUS8319 PE=4 SV=1	2.432	Up	7.8017e-05	TASK_LOCUS8319	113.89
A0A0R3WCB6	Malic enzyme OS=Taenia asiatica OX=60517 GN=TASK_LOCUS8340 PE=3 SV=1	2.127	Up	2.2462e-06	TASK_LOCUS8340	65.258
A0A0R3WCH0	39S ribosomal protein L3(predicted) OS=Taenia asiatica OX=60517 PE=3 SV=1	2.269	Up	2.0205e-05	---	58.638
A0A0R3WCI1	rRNA 2 O methyltransferase fibrillarin(predicted) OS=Taenia asiatica OX=60517 GN=TASK_LOCUS8416 PE=3 SV=1	2.358	Up	4.133e-05	TASK_LOCUS8416	34.169
A0A0R3WCI3	RRM domain-containing protein(predicted) OS=Taenia asiatica OX=60517 GN=TASK_LOCUS8418 PE=4 SV=1	2.542	Up	9.5929e-05	TASK_LOCUS8418	13.912
A0A0R3WCL2	60S ribosomal protein L18a OS=Taenia asiatica OX=60517 GN=TASK_LOCUS8451 PE=3 SV=1	2.368	Up	4.3098e-05	TASK_LOCUS8451	20.982
A0A0R3WCP7	Thioredoxin_16 domain-containing protein(predicted) OS=Taenia asiatica OX=60517 GN=TASK_LOCUS8491 PE=4 SV=1	2.663	Up	0.000157231	TASK_LOCUS8491	26.961
A0A0R3WCP9	Cat eye syndrome critical region protein 5(predicted) OS=Taenia asiatica OX=60517 GN=TASK_LOCUS8493 PE=4 SV=1	2.062	Up	5.3157e-07	TASK_LOCUS8493	49.659
A0A0R3WCS8	Haloacid dehalogenase hydrolase(predicted) OS=Taenia asiatica OX=60517 GN=TASK_LOCUS8525 PE=4 SV=1	2.741	Up	0.00021956	TASK_LOCUS8525	27.169
A0A0R3WCV3	39S ribosomal protein L12(predicted) OS=Taenia asiatica OX=60517 GN=TASK_LOCUS8556 PE=4 SV=1	4.204	Up	0.0027817	TASK_LOCUS8556	20.819
A0A0R3WCW6	Mth938 domain-containing protein (Fragment)(predicted) OS=Taenia asiatica OX=60517 GN=TASK_LOCUS8572 PE=4 SV=1	2.686	Up	0.000184751	TASK_LOCUS8572	14.704
A0A0R3WCY1	Cathepsin B(predicted) OS=Taenia asiatica OX=60517 GN=TASK_LOCUS8592 PE=3 SV=1	3.277	Up	0.00067815	TASK_LOCUS8592	83.355
A0A0R3WD71	Protein sel 1 1(predicted) OS=Taenia asiatica OX=60517 GN=TASK_LOCUS8702 PE=4 SV=1	7.31	Up	0.0076553	TASK_LOCUS8702	67.099
A0A0R3WD86	Superkiller viralicidic activity 2-like 2(predicted) OS=Taenia asiatica OX=60517 GN=TASK_LOCUS8719 PE=4 SV=1	4.013	Up	0.0022234	TASK_LOCUS8719	114.86
A0A0R3WD96	WD_REPEATS_REGION domain-containing protein(predicted) OS=Taenia asiatica OX=60517 GN=TASK_LOCUS8731 PE=4 SV=1	11.818	Up	0.0176235	TASK_LOCUS8731	37.493
A0A0R3WDH4	60S ribosomal protein L35a(predicted) OS=Taenia asiatica OX=60517 GN=TASK_LOCUS8819 PE=3 SV=1	2.857	Up	0.00023944	TASK_LOCUS8819	14.952
A0A0R3WDJ3	Nuclear valosin containing protein(predicted) OS=Taenia asiatica OX=60517 PE=3 SV=2	2.934	Up	0.00028027	---	58.038
A0A0R3WDM1	HTH La-type RNA-binding domain-containing protein(predicted) OS=Taenia asiatica OX=60517 GN=TASK_LOCUS8872 PE=4 SV=2	10.952	Up	0.0174551	TASK_LOCUS8872	132.66
A0A0R3WDN1	CTP synthase OS=Taenia asiatica OX=60517 GN=TASK_LOCUS8882 PE=3 SV=1	2.346	Up	4.1255e-05	TASK_LOCUS8882	73.919
A0A0R3WE15	RRM domain-containing protein(predicted) OS=Taenia asiatica OX=60517 GN=TASK_LOCUS9037 PE=4 SV=1	2.277	Up	2.1348e-05	TASK_LOCUS9037	36.169
A0A0R3WE35	S-adenosylmethionine synthase OS=Taenia asiatica OX=60517 GN=TASK_LOCUS9058 PE=3 SV=2	2.665	Up	0.000157566	TASK_LOCUS9058	44.668
A0A0R3WEB6	Aminotran_1_2 domain-containing protein(predicted) OS=Taenia asiatica OX=60517 GN=TASK_LOCUS9151 PE=3 SV=1	2.011	Up	1.0933e-08	TASK_LOCUS9151	44.949
A0A0R3WED7	WD_REPEATS_REGION domain-containing protein(predicted) OS=Taenia asiatica OX=60517 GN=TASK_LOCUS9175 PE=4 SV=1	2.382	Up	5.6755e-05	TASK_LOCUS9175	35.609
A0A0R3WEI5	Succinate dehydrogenase cytochrome b560 subunit(predicted) OS=Taenia asiatica OX=60517 GN=TASK_LOCUS9235 PE=4 SV=1	3.345	Up	0.00077684	TASK_LOCUS9235	19.117
A0A0R3WEJ0	Glyceraldehyde-3-phosphate dehydrogenase OS=Taenia asiatica OX=60517 GN=TASK_LOCUS9240 PE=3 SV=1	6.624	Up	0.0072958	TASK_LOCUS9240	36.624
A0A0R3WEJ4	P/Homo B domain-containing protein(predicted) OS=Taenia asiatica OX=60517 GN=TASK_LOCUS9245 PE=4 SV=1	2.287	Up	2.3546e-05	TASK_LOCUS9245	67.527
A0A0R3WEN5	Expressed conserved protein(predicted) OS=Taenia asiatica OX=60517 GN=TASK_LOCUS9292 PE=4 SV=1	2.431	Up	7.7259e-05	TASK_LOCUS9292	35.23
A0A0R3WEQ4	KOW domain-containing protein(predicted) OS=Taenia asiatica OX=60517 GN=TASK_LOCUS9313 PE=4 SV=1	2.213	Up	1.72066e-05	TASK_LOCUS9313	17.31
A0A0R3WEU5	Glutathione S-transferase(predicted) OS=Taenia asiatica OX=60517 GN=TASK_LOCUS9360 PE=3 SV=1	2.168	Up	3.7266e-06	TASK_LOCUS9360	21.88
A0A0R3WEY5	J domain-containing protein(predicted) OS=Taenia asiatica OX=60517 GN=TASK_LOCUS9401 PE=4 SV=1	9.714	Up	0.0142769	TASK_LOCUS9401	32.272
A0A0R3WF16	WH2 domain-containing protein(predicted) OS=Taenia asiatica OX=60517 GN=TASK_LOCUS9439 PE=4 SV=1	2.186	Up	1.65048e-05	TASK_LOCUS9439	15.643
A0A0R3WF63	ThiF domain-containing protein(predicted) OS=Taenia asiatica OX=60517 GN=TASK_LOCUS9497 PE=4 SV=1	2.515	Up	7.9347e-05	TASK_LOCUS9497	15.421
A0A0R3WFC1	Glycogenin-1(predicted) OS=Taenia asiatica OX=60517 GN=TASK_LOCUS9565 PE=4 SV=1	2.571	Up	0.000101592	TASK_LOCUS9565	37.409
A0A0R3WFH5	Mitochondrial import receptor subunit tom22(predicted) OS=Taenia asiatica OX=60517 GN=TASK_LOCUS9619 PE=4 SV=1	7.405	Up	0.0081152	TASK_LOCUS9619	18.506
A0A0R3WFJ1	PUA domain-containing protein(predicted) OS=Taenia asiatica OX=60517 GN=TASK_LOCUS9635 PE=4 SV=1	2.274	Up	2.0713e-05	TASK_LOCUS9635	48.674
A0A0R3WFK7	40S ribosomal protein S24 OS=Taenia asiatica OX=60517 GN=TASK_LOCUS9651 PE=3 SV=1	9.435	Up	0.0135617	TASK_LOCUS9651	15.677
A0A0R3WFR4	Cat eye syndrome critical region protein 5(predicted) OS=Taenia asiatica OX=60517 GN=TASK_LOCUS9708 PE=4 SV=1	2.158	Up	3.0358e-06	TASK_LOCUS9708	49.51
A0A0R3WFW9	60S ribosomal protein L21(predicted) OS=Taenia asiatica OX=60517 GN=TASK_LOCUS9763 PE=4 SV=1	2.702	Up	0.000198341	TASK_LOCUS9763	18.554
A0A0R3WFX3	Microsomal glutathione S transferase 3(predicted) OS=Taenia asiatica OX=60517 GN=TASK_LOCUS9767 PE=4 SV=1	3.55	Up	0.00115887	TASK_LOCUS9767	26.641
A0A0R3WG07	DNA helicase OS=Taenia asiatica OX=60517 GN=TASK_LOCUS9801 PE=3 SV=1	10.192	Up	0.0171955	TASK_LOCUS9801	104.48
A0A0R3WGE9	NADH-ubiquinone oxidoreductase subunit(predicted) OS=Taenia asiatica OX=60517 PE=4 SV=1	2.552	Up	9.782e-05	---	107.5
A0A0R3WGK6	Frizzled(predicted) OS=Taenia asiatica OX=60517 GN=TASK_LOCUS10000 PE=3 SV=1	3.669	Up	0.00163512	TASK_LOCUS10000	74.094
A0A0R3WGN5	Aminotran_1_2 domain-containing protein(predicted) OS=Taenia asiatica OX=60517 GN=TASK_LOCUS10029 PE=4 SV=1	2.122	Up	2.0471e-06	TASK_LOCUS10029	29.88
A0A0R3WHA8	Kynureninase(predicted) OS=Taenia asiatica OX=60517 GN=TASK_LOCUS10252 PE=4 SV=1	544.455	Up	0.049761	TASK_LOCUS10252	26.813
A0A158R6D7	RNA cytidine acetyltransferase OS=Taenia asiatica OX=60517 GN=TASK_LOCUS68 PE=3 SV=1	15.216	Up	0.0182639	TASK_LOCUS68	171.82
A0A158R6F6	ATP dependent Clp Protease ATP binding subunit(predicted) OS=Taenia asiatica OX=60517 GN=TASK_LOCUS134 PE=4 SV=1	2.63	Up	0.000124652	TASK_LOCUS134	75.64
A0A158R6K1	AMP deaminase OS=Taenia asiatica OX=60517 GN=TASK_LOCUS372 PE=3 SV=1	2.819	Up	0.00023731	TASK_LOCUS372	95.211
A0A158R6Q0	MACPF domain-containing protein(predicted) OS=Taenia asiatica OX=60517 GN=TASK_LOCUS670 PE=4 SV=1	2.319	Up	3.5838e-05	TASK_LOCUS670	91.015
A0A158R6R9	VWFA domain-containing protein(predicted) OS=Taenia asiatica OX=60517 GN=TASK_LOCUS763 PE=4 SV=1	2.715	Up	0.00020039	TASK_LOCUS763	507.94
A0A158R6T2	BOP1NT domain-containing protein(predicted) OS=Taenia asiatica OX=60517 GN=TASK_LOCUS837 PE=3 SV=1	4.703	Up	0.0033368	TASK_LOCUS837	98.714
A0A158R6T8	WD_REPEATS_REGION domain-containing protein(predicted) OS=Taenia asiatica OX=60517 GN=TASK_LOCUS868 PE=4 SV=1	33.091	Up	0.035138	TASK_LOCUS868	39.804
A0A158R6V7	Cullin-1(predicted) OS=Taenia asiatica OX=60517 GN=TASK_LOCUS958 PE=3 SV=1	3.194	Up	0.00057965	TASK_LOCUS958	163.8
A0A158R778	Glyco_18 domain-containing protein(predicted) OS=Taenia asiatica OX=60517 GN=TASK_LOCUS3311 PE=3 SV=1	2.55	Up	9.6896e-05	TASK_LOCUS3311	40.908
A0A158R7I7	EMC1_C domain-containing protein(predicted) OS=Taenia asiatica OX=60517 PE=4 SV=1	2.264	Up	2.0029e-05	---	95.987
A0A158R7J1	Glycerol-3-phosphate dehydrogenase [NAD(+)] OS=Taenia asiatica OX=60517 GN=TASK_LOCUS3955 PE=3 SV=1	6.119	Up	0.0065823	TASK_LOCUS3955	43.994
A0A158R7Q3	SUN domain-containing protein(predicted) OS=Taenia asiatica OX=60517 GN=TASK_LOCUS4217 PE=4 SV=1	2.28	Up	2.2389e-05	TASK_LOCUS4217	254.02
A0A158R7X1	Nuclear pore membrane glycoprotein(predicted) OS=Taenia asiatica OX=60517 GN=TASK_LOCUS4528 PE=4 SV=1	2.395	Up	5.7978e-05	TASK_LOCUS4528	249.83
A0A158R7X9	AA_TRNA_LIGASE_II domain-containing protein(predicted) OS=Taenia asiatica OX=60517 GN=TASK_LOCUS4556 PE=3 SV=1	2.293	Up	2.4027e-05	TASK_LOCUS4556	78.118
A0A158R800	Phosphatidylinositol 3 kinase regulatory subunit(predicted) OS=Taenia asiatica OX=60517 GN=TASK_LOCUS4651 PE=4 SV=1	2.731	Up	0.00020191	TASK_LOCUS4651	120.07
A0A158R848	Prenylcys_lyase domain-containing protein(predicted) OS=Taenia asiatica OX=60517 GN=TASK_LOCUS4867 PE=4 SV=1	3.106	Up	0.00045852	TASK_LOCUS4867	46.902
A0A158R859	Nardilysin(predicted) OS=Taenia asiatica OX=60517 GN=TASK_LOCUS4904 PE=3 SV=1	2.417	Up	6.4298e-05	TASK_LOCUS4904	135.87
A0A158R869	SAM_MT_RSMB_NOP domain-containing protein(predicted) OS=Taenia asiatica OX=60517 GN=TASK_LOCUS4935 PE=3 SV=1	3.029	Up	0.00039929	TASK_LOCUS4935	89.421
A0A158R8B2	SMC hinge domain-containing protein(predicted) OS=Taenia asiatica OX=60517 GN=TASK_LOCUS5098 PE=4 SV=1	2.417	Up	6.1086e-05	TASK_LOCUS5098	179.26
A0A158R8M8	SSD domain-containing protein(predicted) OS=Taenia asiatica OX=60517 GN=TASK_LOCUS5751 PE=4 SV=1	2.656	Up	0.000143789	TASK_LOCUS5751	94.345
A0A158R8N9	GPI-anchored surface glycoprotein(predicted) OS=Taenia asiatica OX=60517 PE=4 SV=1	2.249	Up	1.82583e-05	---	30.713
A0A158R8P0	GPI anchored surface glycoprotein(predicted) OS=Taenia asiatica OX=60517 GN=TASK_LOCUS5820 PE=4 SV=1	2.029	Up	5.3209e-08	TASK_LOCUS5820	117.81
A0A158R8P3	TPR_REGION domain-containing protein(predicted) OS=Taenia asiatica OX=60517 PE=4 SV=1	3.175	Up	0.00055865	---	104.21
A0A158R8R3	Vps8 domain-containing protein(predicted) OS=Taenia asiatica OX=60517 GN=TASK_LOCUS5956 PE=4 SV=1	3.743	Up	0.00186328	TASK_LOCUS5956	179.49
A0A158R8W1	Pre-mRNA-splicing factor SPF27(predicted) OS=Taenia asiatica OX=60517 GN=TASK_LOCUS6195 PE=4 SV=1	3.211	Up	0.00059752	TASK_LOCUS6195	25.507
A0A158R971	UBR-type domain-containing protein(predicted) OS=Taenia asiatica OX=60517 GN=TASK_LOCUS6771 PE=4 SV=1	2.125	Up	2.1888e-06	TASK_LOCUS6771	702.05
A0A158R9C7	Fibrillar collagen NC1 domain-containing protein(predicted) OS=Taenia asiatica OX=60517 GN=TASK_LOCUS7042 PE=4 SV=1	2.106	Up	1.4495e-06	TASK_LOCUS7042	165.03
A0A158R9H0	Galactose-1-phosphate uridylyltransferase OS=Taenia asiatica OX=60517 GN=TASK_LOCUS7248 PE=3 SV=1	2.034	Up	1.5162e-07	TASK_LOCUS7248	56.453
A0A158R9I4	Troponin i(predicted) OS=Taenia asiatica OX=60517 GN=TASK_LOCUS7318 PE=4 SV=1	2.617	Up	0.000123666	TASK_LOCUS7318	23.503
A0A158R9K6	NUC173 domain-containing protein(predicted) OS=Taenia asiatica OX=60517 GN=TASK_LOCUS7405 PE=4 SV=1	3.11	Up	0.00049544	TASK_LOCUS7405	161.95
A0A158R9L9	RBR-type E3 ubiquitin transferase OS=Taenia asiatica OX=60517 GN=TASK_LOCUS7456 PE=3 SV=1	4.319	Up	0.0027984	TASK_LOCUS7456	50.937
A0A158R9M7	Glycerol-3-phosphate dehydrogenase [NAD(+)] OS=Taenia asiatica OX=60517 GN=TASK_LOCUS7494 PE=3 SV=1	3.055	Up	0.00043724	TASK_LOCUS7494	38.754
A0A158R9Q3	Glutathione S-transferase(predicted) OS=Taenia asiatica OX=60517 GN=TASK_LOCUS7601 PE=3 SV=1	2.084	Up	7.2562e-07	TASK_LOCUS7601	48.386
A0A158R9U6	DNA polymerase phi subunit(predicted) OS=Taenia asiatica OX=60517 GN=TASK_LOCUS7835 PE=4 SV=1	3.856	Up	0.00196488	TASK_LOCUS7835	132.32
A0A158R9V6	Fe-S_biosyn domain-containing protein(predicted) OS=Taenia asiatica OX=60517 GN=TASK_LOCUS7876 PE=4 SV=1	2.28	Up	2.2572e-05	TASK_LOCUS7876	74.247
A0A158R9X1	Dedicator of cytokinesis protein 1(predicted) OS=Taenia asiatica OX=60517 GN=TASK_LOCUS7941 PE=3 SV=1	8.36	Up	0.010383	TASK_LOCUS7941	211.4
A0A158R9X3	WD_REPEATS_REGION domain-containing protein(predicted) OS=Taenia asiatica OX=60517 GN=TASK_LOCUS7950 PE=4 SV=1	2.105	Up	1.3137e-06	TASK_LOCUS7950	48.551
A0A158R9Y1	S5A_REDUCTASE domain-containing protein(predicted) OS=Taenia asiatica OX=60517 PE=4 SV=1	3.029	Up	0.00041557	---	40.952
A0A158RA05	Tyrosine-protein kinase(predicted) OS=Taenia asiatica OX=60517 GN=TASK_LOCUS8178 PE=3 SV=1	2.413	Up	6.0495e-05	TASK_LOCUS8178	60.395
A0A158RA29	PPIase cyclophilin-type domain-containing protein(predicted) OS=Taenia asiatica OX=60517 GN=TASK_LOCUS8287 PE=4 SV=1	3.843	Up	0.00192101	TASK_LOCUS8287	97.704
A0A158RA66	USP domain-containing protein(predicted) OS=Taenia asiatica OX=60517 PE=3 SV=1	4.5	Up	0.0032787	---	341.85
A0A158RA71	Zinc phosphodiesterase(predicted) OS=Taenia asiatica OX=60517 GN=TASK_LOCUS8582 PE=4 SV=1	2.526	Up	8.2061e-05	TASK_LOCUS8582	114.95
A0A158RAB7	Pre mRNA processing splicing factor 8(predicted) OS=Taenia asiatica OX=60517 GN=TASK_LOCUS8938 PE=4 SV=1	2.038	Up	3.065e-07	TASK_LOCUS8938	220.52
A0A158RAI1	ANK_REP_REGION domain-containing protein(predicted) OS=Taenia asiatica OX=60517 PE=4 SV=1	2.929	Up	0.00027621	---	146.23
A3F4S0	60S ribosomal protein L18 OS=Taenia asiatica OX=60517 GN=RPL18 PE=2 SV=1	2.095	Up	8.693e-07	RPL18	20.223
